# Supplementary material
Source: PubMed Central journal article supplement (PMC4624493)
Supplement: NIHMS717748-supplement-2.pdf [file NIHMS717748-supplement-2.pdf]

SUPPLEMENTARY TABLE 1

| Figure Number                     | Test Used      | n               |                 |                   |            |
|-----------------------------------|----------------|-----------------|-----------------|-------------------|------------|
| 1C                                | One-Way ANOVA  | 5 per group     |                 |                   |            |
| Figure 1C ANOVA TABLE             | Sum of Squares | DF              | Mean of Squares | F (DFn, DFd)      | P value    |
| Genotype                          | 24103          | 2               | 12052           | F (2, 12) = 324.2 | P < 0.0001 |
| Residual                          | 446.1          | 12              | 37.17           |                   |            |
| Total                             | 24549          | 14              |                 |                   |            |
| Figure 1C Multiple Comparisons    | Mean Diff.     | 95% CI of diff. | Significant?    | Adjusted P Value  |            |
| Tukey's multiple comparisons test |                |                 |                 |                   |            |
| Control vs. DG, 4 Wks             | 58.4           | 48.11 to 68.69  | Yes             | < 0.0001          |            |
| Control vs. DG, 8 Wks             | 97.56          | 87.27 to 107.8  | Yes             | < 0.0001          |            |
| DG, 4 Wks vs. DG, 8 Wks           | 39.16          | 28.87 to 49.45  | Yes             | < 0.0001          |            |

| Figure Number                                    | Test Used     | n                                             |       |                    |            |
|--------------------------------------------------|---------------|-----------------------------------------------|-------|--------------------|------------|
| 1D                                               | One-Way ANOVA | 6 for control group<br>5 per group for others |       |                    |            |
| Figure 1D ANOVA TABLE                            | SS            | DF                                            | MS    | F (DFn, DFd)       | P value    |
| Genotype                                         | 13.07         | 2                                             | 6.533 | F (2, 13) = 0.2804 | P = 0.7600 |
| Residual                                         | 302.9         | 13                                            | 23.3  |                    |            |
| Total                                            | 316           | 15                                            |       |                    |            |
| ANOVA NOT SIGNIFICANT -- NO MULTIPLE COMPARISONS |               |                                               |       |                    |            |

| Figure Number                                     | Test Used                                                                         | n                                                                                                                      |              |  |
|---------------------------------------------------|-----------------------------------------------------------------------------------|------------------------------------------------------------------------------------------------------------------------|--------------|--|
| 1F                                                | Kaplan-Meier Survival Analysis with Bonferroni correction and Mantel-Cox p-values | 27 for Control Vehicle<br>26 for Control Fluoxetine<br>19 for POMC-Cre/fl1A Vehicle<br>21 for POMC-Cre/fl1A Fluoxetine |              |  |
| Comparisons                                       | 4 Total Comparisons, so .05/4=.0125; p<0.0125 for significance                    |                                                                                                                        |              |  |
| Comparison                                        | Chi-Square                                                                        | P-Value                                                                                                                | Significant? |  |
| Control Vehicle vs Control Fluoxetine             | 31.611                                                                            | < 0.0001                                                                                                               | Yes          |  |
| POMC-Cre/fl1A Vehicle vs POMC-Cre/fl1A Fluoxetine | 0.44                                                                              | 0.5071                                                                                                                 | No           |  |
| Control Vehicle vs POMC-Cre/fl1A Vehicle          | 0.172                                                                             | 0.6782                                                                                                                 | No           |  |
| Control Fluoxetine vs POMC-Cre/fl1A Fluoxetine    | 19.568                                                                            | < 0.0001                                                                                                               | Yes          |  |

| Figure Number                            | Test Used      | n                                                                                                                      |                 |                   |            |
|------------------------------------------|----------------|------------------------------------------------------------------------------------------------------------------------|-----------------|-------------------|------------|
| 1G - Open Arm Entries                    | Two-Way ANOVA  | 27 for Control Vehicle<br>26 for Control Fluoxetine<br>19 for POMC-Cre/fl1A Vehicle<br>21 for POMC-Cre/fl1A Fluoxetine |                 |                   |            |
| Figure 1G - Open Arm Entries ANOVA TABLE | Sum of Squares | DF                                                                                                                     | Mean of Squares | F (DFn, DFd)      | P value    |
| Interaction                              | 53.82          | 1                                                                                                                      | 53.82           | F (1, 89) = 8.120 | P = 0.0054 |
| Genotype                                 | 14.74          | 1                                                                                                                      | 14.74           | F (1, 89) = 2.224 | P = 0.1394 |
| Treatment                                | 64.47          | 1                                                                                                                      | 64.47           | F (1, 89) = 9.728 | P = 0.0024 |
| Residual                                 | 589.8          | 89                                                                                                                     | 6.627           |                   |            |

Figure 1G - Open Arm Entries Multiple Comparisons

| Tukey's multiple comparisons test                  | Mean Diff. | 95% CI of diff.  | Significant? | Adjusted P Value |
|----------------------------------------------------|------------|------------------|--------------|------------------|
| Control Vehicle vs Control Fluoxetine              | -3.221     | -5.073 to -1.369 | Yes          | < 0.0001         |
| Control Vehicle vs POMC-Cre/fl1A Vehicle           | -0.7329    | -2.751 to 1.285  | No           | 0.7775           |
| Control Vehicle vs. POMC-Cre/fl1A Fluoxetine       | -0.8783    | -2.839 to 1.083  | No           | 0.6456           |
| Control Fluoxetine vs. POMC-Cre/fl1A Vehicle       | 2.488      | 0.4535 to 4.522  | Yes          | 0.0101           |
| Control Fluoxetine vs. POMC-Cre/fl1A Fluoxetine    | 2.342      | 0.3649 to 4.320  | Yes          | 0.0135           |
| POMC-Cre/fl1A Vehicle vs. POMC-Cre/fl1A Fluoxetine | -0.1454    | -2.280 to 1.989  | No           | 0.998            |

Figure Number  
1G - Open Arm Duration

Test Used  
Two-Way ANOVA

n  
27 for Control Vehicle  
26 for Control Fluoxetine  
19 for POMC-Cre/fl1A Vehicle  
21 for POMC-Cre/fl1A Fluoxetine

Figure 1G - Open Arm Duration ANOVA TABLE

|             | Sum of Squares | DF | Mean of Squares | F (DFn, DFd)      | P value    |
|-------------|----------------|----|-----------------|-------------------|------------|
| Interaction | 8764           | 1  | 8764            | F (1, 89) = 6.435 | P = 0.0129 |
| Genotype    | 2362           | 1  | 2362            | F (1, 89) = 1.734 | P = 0.1912 |
| Treatment   | 12726          | 1  | 12726           | F (1, 89) = 9.344 | P = 0.0030 |
| Residual    | 121222         | 89 | 1362            |                   |            |

Figure 1G - Open Arm Duration Multiple Comparisons

| Tukey's multiple comparisons test                  | Mean Diff. | 95% CI of diff.  | Significant? | Adjusted P Value |
|----------------------------------------------------|------------|------------------|--------------|------------------|
| Control Vehicle vs Control Fluoxetine              | -43.27     | -69.82 to -16.72 | Yes          | 0.0003           |
| Control Vehicle vs POMC-Cre/fl1A Vehicle           | -9.436     | -38.37 to 19.50  | No           | 0.8284           |
| Control Vehicle vs. POMC-Cre/fl1A Fluoxetine       | -13.46     | -41.57 to 14.66  | No           | 0.5948           |
| Control Fluoxetine vs. POMC-Cre/fl1A Vehicle       | 33.83      | 4.670 to 63.00   | Yes          | 0.0162           |
| Control Fluoxetine vs. POMC-Cre/fl1A Fluoxetine    | 29.81      | 1.461 to 58.16   | Yes          | 0.0354           |
| POMC-Cre/fl1A Vehicle vs. POMC-Cre/fl1A Fluoxetine | -4.023     | -34.62 to 26.57  | No           | 0.9859           |

Figure Number  
1H

Test Used  
Two-Way ANOVA

n  
27 for Control Vehicle  
25 for Control Fluoxetine  
18 for POMC-Cre/fl1A Vehicle  
20 for POMC-Cre/fl1A Fluoxetine

Figure 1H ANOVA TABLE

|             | Sum of Squares | DF | Mean of Squares | F (DFn, DFd)      | P value    |
|-------------|----------------|----|-----------------|-------------------|------------|
| Interaction | 21054          | 1  | 21054           | F (1, 86) = 9.769 | P = 0.0024 |
| Genotype    | 13703          | 1  | 13703           | F (1, 86) = 6.358 | P = 0.0135 |
| Treatment   | 75582          | 1  | 75582           | F (1, 86) = 35.07 | P < 0.0001 |
| Residual    | 185353         | 86 | 2155            |                   |            |

Figure 1H Multiple Comparisons

| Tukey's multiple comparisons test                  | Mean Diff. | 95% CI of diff.  | Significant? | Adjusted P Value |
|----------------------------------------------------|------------|------------------|--------------|------------------|
| Control Vehicle vs Control Fluoxetine              | 89.74      | 55.98 to 123.5   | Yes          | < 0.0001         |
| Control Vehicle vs POMC-Cre/fl1A Vehicle           | 5.991      | -31.02 to 43.00  | No           | 0.9742           |
| Control Vehicle vs. POMC-Cre/fl1A Fluoxetine       | 33.73      | -2.157 to 69.61  | No           | 0.0732           |
| Control Fluoxetine vs. POMC-Cre/fl1A Vehicle       | -83.75     | -121.3 to -46.15 | Yes          | < 0.0001         |
| Control Fluoxetine vs. POMC-Cre/fl1A Fluoxetine    | -56.01     | -92.50 to -19.52 | Yes          | 0.0007           |
| POMC-Cre/fl1A Vehicle vs. POMC-Cre/fl1A Fluoxetine | 27.74      | -11.78 to 67.25  | No           | 0.2624           |

| Figure Number                                      | Test Used        | n            |                    |                              |  |
|----------------------------------------------------|------------------|--------------|--------------------|------------------------------|--|
| 2C                                                 | Student's t-test | 5 per group  |                    |                              |  |
| F test to compare variances                        |                  |              |                    |                              |  |
| Control (AAV8-CamKII-GFP) vs AAV-CamKII-Cre        | F, DFn, Dfd      | P value      | Significant?       | Welch's correction necessary |  |
|                                                    | 12.59, 4, 4      | 0.0309       | Yes                |                              |  |
| Figure 2C Student's t-test with Welch's correction |                  |              |                    |                              |  |
| Control (AAV8-CamKII-GFP) vs AAV-CamKII-Cre        | P value          | Significant? | One or two tailed? | Welch corrected t, df        |  |
|                                                    | 0.001            | Yes          | Two-tailed         | t=7.430 df=4.632             |  |

| Figure Number                               | Test Used        | n            |                    |              |  |
|---------------------------------------------|------------------|--------------|--------------------|--------------|--|
| 2D                                          | Student's t-test | 5 per group  |                    |              |  |
| F test to compare variances                 |                  |              |                    |              |  |
| Control (AAV8-CamKII-GFP) vs AAV-CamKII-Cre | F, DFn, Dfd      | P value      | Significant?       |              |  |
|                                             | 1.042, 4, 4      | 0.9689       | No                 |              |  |
| Figure 2D Student's t-test                  |                  |              |                    |              |  |
| Control (AAV8-CamKII-GFP) vs AAV-CamKII-Cre | P value          | Significant? | One or two tailed? | t, df        |  |
|                                             | 0.7593           | No           | Two-tailed         | t=0.317 df=8 |  |

| Figure Number                                                      | Test Used                                                                         | n                                                                                                                                                              |              |
|--------------------------------------------------------------------|-----------------------------------------------------------------------------------|----------------------------------------------------------------------------------------------------------------------------------------------------------------|--------------|
| 2E                                                                 | Kaplan-Meier Survival Analysis with Bonferroni correction and Mantel-Cox p-values | 14 for AAV8-CamKII-GFP/fl1A Vehicle<br>14 for AAV8-CamKII-GFP/fl1A Fluoxetine<br>14 for AAV8-CamKII-Cre/fl1A Vehicle<br>16 for AAV8-CamKII-Cre/fl1A Fluoxetine |              |
| Comparisons                                                        |                                                                                   |                                                                                                                                                                |              |
| 4 Total Comparisons, so .05/4=.0125; p<0.0125 for significance     |                                                                                   |                                                                                                                                                                |              |
| Comparison                                                         | Chi-Square                                                                        | P-Value                                                                                                                                                        | Significant? |
| AAV8-CamKII-GFP/fl1A Vehicle vs AAV8-CamKII-GFP/fl1A Fluoxetine    | 12.333                                                                            | 0.0004                                                                                                                                                         | Yes          |
| AAV8-CamKII-Cre/fl1A Vehicle vs AAV8-CamKII-Cre/fl1A Fluoxetine    | 0.931                                                                             | 0.3345                                                                                                                                                         | No           |
| AAV8-CamKII-GFP/fl1A Vehicle vs AAV8-CamKII-Cre/fl1A Vehicle       | 1.628                                                                             | 0.202                                                                                                                                                          | No           |
| AAV8-CamKII-GFP/fl1A Fluoxetine vs AAV8-CamKII-Cre/fl1A Fluoxetine | 11.482                                                                            | 0.0007                                                                                                                                                         | Yes          |

| Figure Number                                                      | Test Used      | n                                                                                                                                                              |                 |                   |            |  |
|--------------------------------------------------------------------|----------------|----------------------------------------------------------------------------------------------------------------------------------------------------------------|-----------------|-------------------|------------|--|
| 2F - Open Arm Entries                                              | Two-Way ANOVA  | 14 for AAV8-CamKII-GFP/fl1A Vehicle<br>14 for AAV8-CamKII-GFP/fl1A Fluoxetine<br>14 for AAV8-CamKII-Cre/fl1A Vehicle<br>15 for AAV8-CamKII-Cre/fl1A Fluoxetine |                 |                   |            |  |
| Figure 2F - Open Arm Entries ANOVA TABLE                           |                |                                                                                                                                                                |                 |                   |            |  |
|                                                                    | Sum of Squares | DF                                                                                                                                                             | Mean of Squares | F (DFn, DFd)      | P value    |  |
| Interaction                                                        | 56.95          | 1                                                                                                                                                              | 56.95           | F (1, 53) = 13.95 | P = 0.0005 |  |
| Virus                                                              | 38.43          | 1                                                                                                                                                              | 38.43           | F (1, 53) = 9.410 | P = 0.0034 |  |
| Treatment                                                          | 38.43          | 1                                                                                                                                                              | 38.43           | F (1, 53) = 9.410 | P = 0.0034 |  |
| Residual                                                           | 216.4          | 53                                                                                                                                                             | 4.084           |                   |            |  |
| Figure 2F - Open Arm Entries Multiple Comparisons                  |                |                                                                                                                                                                |                 |                   |            |  |
| Tukey's multiple comparisons test                                  |                |                                                                                                                                                                |                 |                   |            |  |
|                                                                    | Mean Diff.     | 95% CI of diff.                                                                                                                                                | Significant?    | Adjusted P Value  |            |  |
| AAV8-CamKII-GFP/fl1A Vehicle vs AAV8-CamKII-GFP/fl1A Fluoxetine    | -3.643         | -5.669 to -1.617                                                                                                                                               | Yes             | < 0.0001          |            |  |
| AAV8-CamKII-GFP/fl1A Vehicle vs AAV8-CamKII-Cre/fl1A Vehicle       | -0.3571        | -2.383 to 1.669                                                                                                                                                | No              | 0.9658            |            |  |
| AAV8-CamKII-GFP/fl1A Vehicle vs AAV8-CamKII-Cre/fl1A Fluoxetine    | 0              | -1.992 to 1.992                                                                                                                                                | No              | > 0.9999          |            |  |
| AAV8-CamKII-GFP/fl1A Fluoxetine vs AAV8-CamKII-Cre/fl1A Vehicle    | 3.286          | 1.260 to 5.312                                                                                                                                                 | Yes             | 0.0004            |            |  |
| AAV8-CamKII-GFP/fl1A Fluoxetine vs AAV8-CamKII-Cre/fl1A Fluoxetine | 3.643          | 1.651 to 5.635                                                                                                                                                 | Yes             | < 0.0001          |            |  |
| AAV8-CamKII-Cre/fl1A Vehicle vs AAV8-CamKII-Cre/fl1A Fluoxetine    | 0.3571         | -1.635 to 2.349                                                                                                                                                | No              | 0.9641            |            |  |

| Figure Number                                                      | Test Used      | n                                   |                                        |                                     |                                        |
|--------------------------------------------------------------------|----------------|-------------------------------------|----------------------------------------|-------------------------------------|----------------------------------------|
| 2F - Open Arm Duration                                             | Two-Way ANOVA  | 14 for AAV8-CamKII-GFP/fl1A Vehicle | 14 for AAV8-CamKII-GFP/fl1A Fluoxetine | 14 for AAV8-CamKII-Cre/fl1A Vehicle | 15 for AAV8-CamKII-Cre/fl1A Fluoxetine |
| Figure 2F - Open Arm Duration ANOVA TABLE                          | Sum of Squares | DF                                  | Mean of Squares                        | F (DFn, DFd)                        | P value                                |
| Interaction                                                        | 2329           | 1                                   | 2329                                   | F (1, 53) = 13.00                   | P = 0.0007                             |
| Virus                                                              | 1231           | 1                                   | 1231                                   | F (1, 53) = 6.871                   | P = 0.0114                             |
| Treatment                                                          | 1202           | 1                                   | 1202                                   | F (1, 53) = 6.712                   | P = 0.0123                             |
| Residual                                                           | 9492           | 53                                  | 179.1                                  |                                     |                                        |
| Figure 2F - Open Arm Duration Multiple Comparisons                 |                |                                     |                                        |                                     |                                        |
| Tukey's multiple comparisons test                                  |                |                                     |                                        |                                     |                                        |
|                                                                    | Mean Diff.     | 95% CI of diff.                     | Significant?                           | Adjusted P Value                    |                                        |
| AAV8-CamKII-GFP/fl1A Vehicle vs AAV8-CamKII-GFP/fl1A Fluoxetine    | -21.98         | -35.40 to -8.562                    | Yes                                    | 0.0004                              |                                        |
| AAV8-CamKII-GFP/fl1A Vehicle vs AAV8-CamKII-Cre/fl1A Vehicle       | -3.493         | -16.91 to 9.924                     | No                                     | 0.9003                              |                                        |
| AAV8-CamKII-GFP/fl1A Vehicle vs AAV8-CamKII-Cre/fl1A Fluoxetine    | 0.1076         | -13.08 to 13.30                     | No                                     | > 0.9999                            |                                        |
| AAV8-CamKII-GFP/fl1A Fluoxetine vs AAV8-CamKII-Cre/fl1A Vehicle    | 18.49          | 5.069 to 31.90                      | Yes                                    | 0.0032                              |                                        |
| AAV8-CamKII-GFP/fl1A Fluoxetine vs AAV8-CamKII-Cre/fl1A Fluoxetine | 22.09          | 8.895 to 35.28                      | Yes                                    | 0.0003                              |                                        |
| AAV8-CamKII-Cre/fl1A Vehicle vs AAV8-CamKII-Cre/fl1A Fluoxetine    | 3.6            | -9.591 to 16.79                     | No                                     | 0.8871                              |                                        |

| Figure Number                                                      | Test Used      | n                                   |                                        |                                     |                                        |
|--------------------------------------------------------------------|----------------|-------------------------------------|----------------------------------------|-------------------------------------|----------------------------------------|
| 2G                                                                 | Two-Way ANOVA  | 14 for AAV8-CamKII-GFP/fl1A Vehicle | 14 for AAV8-CamKII-GFP/fl1A Fluoxetine | 14 for AAV8-CamKII-Cre/fl1A Vehicle | 16 for AAV8-CamKII-Cre/fl1A Fluoxetine |
| Figure 2G ANOVA TABLE                                              | Sum of Squares | DF                                  | Mean of Squares                        | F (DFn, DFd)                        | P value                                |
| Interaction                                                        | 14256          | 1                                   | 14256                                  | F (1, 54) = 5.385                   | P = 0.0241                             |
| Virus                                                              | 15548          | 1                                   | 15548                                  | F (1, 54) = 5.873                   | P = 0.0188                             |
| Treatment                                                          | 12698          | 1                                   | 12698                                  | F (1, 54) = 4.797                   | P = 0.0328                             |
| Residual                                                           | 142948         | 54                                  | 2647                                   |                                     |                                        |
| Figure 2G Multiple Comparisons                                     |                |                                     |                                        |                                     |                                        |
| Tukey's multiple comparisons test                                  |                |                                     |                                        |                                     |                                        |
|                                                                    | Mean Diff.     | 95% CI of diff.                     | Significant?                           | Adjusted P Value                    |                                        |
| AAV8-CamKII-GFP/fl1A Vehicle vs AAV8-CamKII-GFP/fl1A Fluoxetine    | 61.05          | 9.500 to 112.6                      | Yes                                    | 0.0142                              |                                        |
| AAV8-CamKII-GFP/fl1A Vehicle vs AAV8-CamKII-Cre/fl1A Vehicle       | -1.393         | -52.94 to 50.16                     | No                                     | 0.9999                              |                                        |
| AAV8-CamKII-GFP/fl1A Vehicle vs AAV8-CamKII-Cre/fl1A Fluoxetine    | -3.158         | -53.07 to 46.76                     | No                                     | 0.9983                              |                                        |
| AAV8-CamKII-GFP/fl1A Fluoxetine vs AAV8-CamKII-Cre/fl1A Vehicle    | -62.44         | -114.0 to -10.89                    | Yes                                    | 0.0116                              |                                        |
| AAV8-CamKII-GFP/fl1A Fluoxetine vs AAV8-CamKII-Cre/fl1A Fluoxetine | -64.21         | -114.1 to -14.29                    | Yes                                    | 0.0066                              |                                        |
| AAV8-CamKII-Cre/fl1A Vehicle vs AAV8-CamKII-Cre/fl1A Fluoxetine    | -1.765         | -51.68 to 48.15                     | No                                     | 0.9997                              |                                        |

| Figure Number                                  | Test Used                                                                         | n            |              |  |
|------------------------------------------------|-----------------------------------------------------------------------------------|--------------|--------------|--|
| 3B                                             | Kaplan-Meier Survival Analysis with Bonferroni correction and Mantel-Cox p-values | 15 per group |              |  |
| Comparisons                                    | 9 Total Comparisons, so .05/9=.0056; p<0.0056 for significance                    |              |              |  |
| Comparison (All Mice are Nestin-CreER)         | Chi-Square                                                                        | P-Value      | Significant? |  |
| Vehicle Vehicle vs Vehicle Fluoxetine (8 wks)  | 20.399                                                                            | <0.0001      | Yes          |  |
| Vehicle Vehicle vs Vehicle Fluoxetine (11 wks) | 13.573                                                                            | 0.0002       | Yes          |  |

|                                                                              |        |         |     |
|------------------------------------------------------------------------------|--------|---------|-----|
| Vehicle Fluoxetine (8 wks) vs Vehicle Fluoxetine (11 wks)                    | 0.462  | 0.4967  | No  |
| Tamoxifen (8 wks) Vehicle vs Tamoxifen (8wks) Fluoxetine (8 wks)             | 11.222 | 0.0008  | Yes |
| Tamoxifen (8 wks) Vehicle vs Tamoxifen (8wks) Fluoxetine (11 wks)            | 18.435 | <0.0001 | Yes |
| Tamoxifen (8 wks) Fluoxetine (8 wks) vs Tamoxifen (8wks) Fluoxetine (11 wks) | 0.131  | 0.7175  | No  |
| Vehicle Vehicle vs Tamoxifen (8 wks) Vehicle                                 | 0.037  | 0.8481  | No  |
| Vehicle Fluoxetine (8 wks) vs Tamoxifen (8 wks) Fluoxetine (8 wks)           | 0.27   | 0.6032  | No  |
| Vehicle Fluoxetine (11 wks) vs Tamoxifen (8 wks) Fluoxetine (11 wks)         | 0.123  | 0.7256  | No  |

| Figure Number                                          | Test Used      | n            |                 |                      |            |
|--------------------------------------------------------|----------------|--------------|-----------------|----------------------|------------|
| 3C - Open Arm Entries                                  | Two-Way ANOVA  | 15 per group |                 |                      |            |
| Figure 3C - Open Arm Entries ANOVA TABLE               | Sum of Squares | DF           | Mean of Squares | F (DFn, DFd)         | P value    |
| Interaction                                            | 3.356          | 2            | 1.678           | F (2, 84) = 0.1399   | P = 0.8696 |
| Pretreatment                                           | 0.04444        | 1            | 0.04444         | F (1, 84) = 0.003706 | P = 0.9516 |
| Treatment                                              | 411.1          | 2            | 205.5           | F (2, 84) = 17.14    | P < 0.0001 |
| Residual                                               | 1007           | 84           | 11.99           |                      |            |
| INTERACTION NOT SIGNIFICANT -- NO MULTIPLE COMPARISONS |                |              |                 |                      |            |

| Figure Number                                          | Test Used      | n            |                 |                   |            |
|--------------------------------------------------------|----------------|--------------|-----------------|-------------------|------------|
| 3C - Open Arm Duration                                 | Two-Way ANOVA  | 15 per group |                 |                   |            |
| Figure 3C - Open Arm Duration ANOVA TABLE              | Sum of Squares | DF           | Mean of Squares | F (DFn, DFd)      | P value    |
| Interaction                                            | 141.54         | 2            | 70.77           | F (2, 84) = 0.109 | P = 0.8967 |
| Pretreatment                                           | 3.803          | 1            | 3.803           | F (1, 84) = 0.006 | P = 0.9391 |
| Treatment                                              | 47814.5        | 2            | 23907.3         | F (2, 84) = 36.88 | P < 0.0001 |
| Residual                                               | 54448.2        | 84           | 648.2           |                   |            |
| INTERACTION NOT SIGNIFICANT -- NO MULTIPLE COMPARISONS |                |              |                 |                   |            |

| Figure Number                                          | Test Used      | n            |                 |                   |            |
|--------------------------------------------------------|----------------|--------------|-----------------|-------------------|------------|
| 3D                                                     | Two-Way ANOVA  | 15 per group |                 |                   |            |
| Figure 3D ANOVA TABLE                                  | Sum of Squares | DF           | Mean of Squares | F (DFn, DFd)      | P value    |
| Interaction                                            | 483.5          | 2            | 241.7           | F (2, 84) = 0.156 | P = 0.8557 |
| Pretreatment                                           | 240.1          | 1            | 240.1           | F (1, 84) = 0.155 | P = 0.6948 |
| Treatment                                              | 154161.2       | 2            | 77080.6         | F (2, 84) = 49.77 | P < 0.0001 |
| Residual                                               |                | 84           |                 |                   |            |
| INTERACTION NOT SIGNIFICANT -- NO MULTIPLE COMPARISONS |                |              |                 |                   |            |

| Figure Number                                                   | Test Used                                                                         | n                        |              |  |
|-----------------------------------------------------------------|-----------------------------------------------------------------------------------|--------------------------|--------------|--|
| 4D                                                              | Kaplan-Meier Survival Analysis with Bonferroni correction and Mantel-Cox p-values | 17 for 1A KO Vehicle     |              |  |
| Comparisons                                                     |                                                                                   | 15 for 1A KO Fluoxetine  |              |  |
|                                                                 |                                                                                   | 13 for DG-1A+ Vehicle    |              |  |
|                                                                 |                                                                                   | 17 for DG-1A+ Fluoxetine |              |  |
| 4 Total Comparisons, so .05/4=0.0125; p<0.0125 for significance |                                                                                   |                          |              |  |
| Comparison                                                      | Chi-Square                                                                        | P-Value                  | Significant? |  |
| 1A KO Vehicle vs 1A KO Fluoxetine                               | 0.109                                                                             | 0.7412                   | No           |  |
| DG-1A+ Vehicle vs DG-1A+ Fluoxetine                             | 7.064                                                                             | 0.0079                   | Yes          |  |

|                                       |        |        |     |
|---------------------------------------|--------|--------|-----|
| 1A KO Vehicle vs DG-1A+ Vehicle       | 0.025  | 0.8734 | No  |
| 1A KO Fluoxetine vs DG-1A+ Fluoxetine | 10.136 | 0.0015 | Yes |

| Figure Number                                     | Test Used      | n                                                                                                    |                  |                   |                  |
|---------------------------------------------------|----------------|------------------------------------------------------------------------------------------------------|------------------|-------------------|------------------|
| 4E - Open Arm Entries                             | Two-Way ANOVA  | 17 for 1A KO Vehicle<br>15 for 1A KO Fluoxetine<br>13 for DG-1A+ Vehicle<br>17 for DG-1A+ Fluoxetine |                  |                   |                  |
| Figure 4E - Open Arm Entries ANOVA TABLE          |                |                                                                                                      |                  |                   |                  |
|                                                   | Sum of Squares | DF                                                                                                   | Mean of Squares  | F (DFn, DFd)      | P value          |
| Interaction                                       | 77.2           | 1                                                                                                    | 77.2             | F (1, 58) = 7.204 | P = 0.0095       |
| Genotype                                          | 107.7          | 1                                                                                                    | 107.7            | F (1, 58) = 10.05 | P = 0.0024       |
| Treatment                                         | 80.19          | 1                                                                                                    | 80.19            | F (1, 58) = 7.483 | P = 0.0082       |
| Residual                                          | 621.6          | 58                                                                                                   | 10.72            |                   |                  |
| Figure 4E - Open Arm Entries Multiple Comparisons |                |                                                                                                      |                  |                   |                  |
| Tukey's multiple comparisons test                 |                | Mean Diff.                                                                                           | 95% CI of diff.  | Significant?      | Adjusted P Value |
| 1A KO Vehicle vs 1A KO Fluoxetine                 |                | -0.04314                                                                                             | -3.111 to 3.024  | No                | > 0.9999         |
| 1A KO Vehicle vs DG-1A+ Vehicle                   |                | -0.4072                                                                                              | -3.598 to 2.783  | No                | 0.9866           |
| 1A KO Vehicle vs DG-1A+ Fluoxetine                |                | -4.941                                                                                               | -7.911 to -1.971 | Yes               | 0.0003           |
| 1A KO Fluoxetine vs DG-1A+ Vehicle                |                | -0.3641                                                                                              | -3.645 to 2.917  | No                | 0.9911           |
| 1A KO Fluoxetine vs DG-1A+ Fluoxetine             |                | -4.898                                                                                               | -7.966 to -1.831 | Yes               | 0.0005           |
| DG-1A+ Vehicle vs DG-1A+ Fluoxetine               |                | -4.534                                                                                               | -7.724 to -1.344 | Yes               | 0.0022           |

| Figure Number                                      | Test Used      | n                                                                                                    |                  |                   |                  |
|----------------------------------------------------|----------------|------------------------------------------------------------------------------------------------------|------------------|-------------------|------------------|
| 4E - Open Arm Duration                             | Two-Way ANOVA  | 17 for 1A KO Vehicle<br>15 for 1A KO Fluoxetine<br>13 for DG-1A+ Vehicle<br>17 for DG-1A+ Fluoxetine |                  |                   |                  |
| Figure 4E - Open Arm Duration ANOVA TABLE          |                |                                                                                                      |                  |                   |                  |
|                                                    | Sum of Squares | DF                                                                                                   | Mean of Squares  | F (DFn, DFd)      | P value          |
| Interaction                                        | 944.9          | 1                                                                                                    | 944.9            | F (1, 58) = 6.773 | P = 0.0117       |
| Genotype                                           | 711.1          | 1                                                                                                    | 711.1            | F (1, 58) = 5.097 | P = 0.0277       |
| Treatment                                          | 654.5          | 1                                                                                                    | 654.5            | F (1, 58) = 4.692 | P = 0.0344       |
| Residual                                           | 8091           | 58                                                                                                   | 139.5            |                   |                  |
| Figure 4E - Open Arm Duration Multiple Comparisons |                |                                                                                                      |                  |                   |                  |
| Tukey's multiple comparisons test                  |                | Mean Diff.                                                                                           | 95% CI of diff.  | Significant?      | Adjusted P Value |
| 1A KO Vehicle vs 1A KO Fluoxetine                  |                | 1.318                                                                                                | -9.750 to 12.39  | No                | 0.9891           |
| 1A KO Vehicle vs DG-1A+ Vehicle                    |                | 1.041                                                                                                | -10.47 to 12.55  | No                | 0.9951           |
| 1A KO Vehicle vs DG-1A+ Fluoxetine                 |                | -13.35                                                                                               | -24.07 to -2.637 | Yes               | 0.0089           |
| 1A KO Fluoxetine vs DG-1A+ Vehicle                 |                | -0.2769                                                                                              | -12.12 to 11.56  | No                | > 0.9999         |
| 1A KO Fluoxetine vs DG-1A+ Fluoxetine              |                | -14.67                                                                                               | -25.74 to -3.603 | Yes               | 0.0048           |
| DG-1A+ Vehicle vs DG-1A+ Fluoxetine                |                | -14.39                                                                                               | -25.90 to -2.883 | Yes               | 0.0086           |

| Figure Number | Test Used     | n                                                                                                    |  |  |
|---------------|---------------|------------------------------------------------------------------------------------------------------|--|--|
| 4F            | Two-Way ANOVA | 17 for 1A KO Vehicle<br>15 for 1A KO Fluoxetine<br>13 for DG-1A+ Vehicle<br>17 for DG-1A+ Fluoxetine |  |  |

| Figure 4F ANOVA TABLE                 |                |                 |                 |                   |            |  |
|---------------------------------------|----------------|-----------------|-----------------|-------------------|------------|--|
|                                       | Sum of Squares | DF              | Mean of Squares | F (DFn, DFd)      | P value    |  |
| Interaction                           | 6388           | 1               | 6388            | F (1, 58) = 4.848 | P = 0.0317 |  |
| Genotype                              | 5006           | 1               | 5006            | F (1, 58) = 3.799 | P = 0.0561 |  |
| Treatment                             | 25417          | 1               | 25417           | F (1, 58) = 19.29 | P < 0.0001 |  |
| Residual                              | 76421          | 58              | 1318            |                   |            |  |
| Figure 4F Multiple Comparisons        |                |                 |                 |                   |            |  |
| Tukey's multiple comparisons test     | Mean Diff.     | 95% CI of diff. | Significant?    | Adjusted P Value  |            |  |
| 1A KO Vehicle vs 1A KO Fluoxetine     | 20.32          | -13.70 to 54.33 | No              | 0.3978            |            |  |
| 1A KO Vehicle vs DG-1A+ Vehicle       | -2.344         | -37.72 to 33.03 | No              | 0.9981            |            |  |
| 1A KO Vehicle vs DG-1A+ Fluoxetine    | 58.82          | 25.89 to 91.76  | Yes             | < 0.0001          |            |  |
| 1A KO Fluoxetine vs DG-1A+ Vehicle    | -22.66         | -59.04 to 13.72 | No              | 0.3606            |            |  |
| 1A KO Fluoxetine vs DG-1A+ Fluoxetine | 38.51          | 4.493 to 72.52  | Yes             | 0.0205            |            |  |
| DG-1A+ Vehicle vs DG-1A+ Fluoxetine   | 61.17          | 25.79 to 96.54  | Yes             | 0.0001            |            |  |

| Figure Number 5B                                   |                |                  |                 |                   |            |  |
|----------------------------------------------------|----------------|------------------|-----------------|-------------------|------------|--|
| Figure Number                                      | Test Used      | n                |                 |                   |            |  |
| 5B                                                 | Two-Way ANOVA  | 8 per group      |                 |                   |            |  |
| Figure 5B ANOVA TABLE                              |                |                  |                 |                   |            |  |
|                                                    | Sum of Squares | DF               | Mean of Squares | F (DFn, DFd)      | P value    |  |
| Interaction                                        | 26335          | 1                | 26335           | F (1, 28) = 10.66 | P = 0.0029 |  |
| Genotype                                           | 22366          | 1                | 22366           | F (1, 28) = 9.049 | P = 0.0055 |  |
| Treatment                                          | 355325         | 1                | 355325          | F (1, 28) = 143.8 | P < 0.0001 |  |
| Residual                                           | 69204          | 28               | 2472            |                   |            |  |
| Figure 5B Multiple Comparisons                     |                |                  |                 |                   |            |  |
| Tukey's multiple comparisons test                  | Mean Diff.     | 95% CI of diff.  | Significant?    | Adjusted P Value  |            |  |
| Control Vehicle vs Control Fluoxetine              | -268.1         | -336.0 to -200.3 | Yes             | < 0.0001          |            |  |
| Control Vehicle vs POMC-Cre/fl1A Vehicle           | -4.5           | -72.37 to 63.37  | No              | 0.9978            |            |  |
| Control Vehicle vs. POMC-Cre/fl1A Fluoxetine       | -157.9         | -225.7 to -90.01 | Yes             | < 0.0001          |            |  |
| Control Fluoxetine vs. POMC-Cre/fl1A Vehicle       | 263.6          | 195.8 to 331.5   | Yes             | < 0.0001          |            |  |
| Control Fluoxetine vs. POMC-Cre/fl1A Fluoxetine    | 110.3          | 42.38 to 178.1   | Yes             | 0.0007            |            |  |
| POMC-Cre/fl1A Vehicle vs. POMC-Cre/fl1A Fluoxetine | -153.4         | -221.2 to -85.51 | Yes             | < 0.0001          |            |  |

| Figure Number 5C                                   |                |                 |                 |                   |            |  |
|----------------------------------------------------|----------------|-----------------|-----------------|-------------------|------------|--|
| Figure Number                                      | Test Used      | n               |                 |                   |            |  |
| 5C                                                 | Two-Way ANOVA  | 8 per group     |                 |                   |            |  |
| Figure 5C ANOVA TABLE                              |                |                 |                 |                   |            |  |
|                                                    | Sum of Squares | DF              | Mean of Squares | F (DFn, DFd)      | P value    |  |
| Interaction                                        | 2.61E+06       | 1               | 2.61E+06        | F (1, 28) = 5.292 | P = 0.0291 |  |
| Genotype                                           | 1.97E+06       | 1               | 1.97E+06        | F (1, 28) = 3.996 | P = 0.0554 |  |
| Treatment                                          | 4.79E+07       | 1               | 4.79E+07        | F (1, 28) = 97.02 | P < 0.0001 |  |
| Residual                                           | 1.38E+07       | 28              | 493425          |                   |            |  |
| Figure 5C Multiple Comparisons                     |                |                 |                 |                   |            |  |
| Tukey's multiple comparisons test                  | Mean Diff.     | 95% CI of diff. | Significant?    | Adjusted P Value  |            |  |
| Control Vehicle vs Control Fluoxetine              | -3018          | -3976 to -2059  | Yes             | < 0.0001          |            |  |
| Control Vehicle vs POMC-Cre/fl1A Vehicle           | -74.88         | -1034 to 884.1  | No              | 0.9965            |            |  |
| Control Vehicle vs. POMC-Cre/fl1A Fluoxetine       | -1950          | -2909 to -990.8 | Yes             | < 0.0001          |            |  |
| Control Fluoxetine vs. POMC-Cre/fl1A Vehicle       | 2943           | 1984 to 3902    | Yes             | < 0.0001          |            |  |
| Control Fluoxetine vs. POMC-Cre/fl1A Fluoxetine    | 1068           | 108.8 to 2027   | Yes             | 0.0247            |            |  |
| POMC-Cre/fl1A Vehicle vs. POMC-Cre/fl1A Fluoxetine | -1875          | -2834 to -915.9 | Yes             | < 0.0001          |            |  |

| Figure Number<br>5D                                | Test Used<br>Two-Way ANOVA | n<br>8 per group |                 |                   |            |
|----------------------------------------------------|----------------------------|------------------|-----------------|-------------------|------------|
| Figure 5D ANOVA TABLE                              | Sum of Squares             | DF               | Mean of Squares | F (DFn, DFd)      | P value    |
| Interaction                                        | 686206                     | 1                | 686206          | F (1, 28) = 4.954 | P = 0.0343 |
| Genotype                                           | 650370                     | 1                | 650370          | F (1, 28) = 4.695 | P = 0.0389 |
| Treatment                                          | 9.13E+06                   | 1                | 9.13E+06        | F (1, 28) = 65.89 | P < 0.0001 |
| Residual                                           | 3.88E+06                   | 28               | 138518          |                   |            |
| Figure 5D Multiple Comparisons                     |                            |                  |                 |                   |            |
| Tukey's multiple comparisons test                  | Mean Diff.                 | 95% CI of diff.  | Significant?    | Adjusted P Value  |            |
| Control Vehicle vs Control Fluoxetine              | -1361                      | -1869 to -852.9  | Yes             | < 0.0001          |            |
| Control Vehicle vs POMC-Cre/fl1A Vehicle           | -7.75                      | -515.8 to 500.3  | No              | > 0.9999          |            |
| Control Vehicle vs. POMC-Cre/fl1A Fluoxetine       | -783                       | -1291 to -274.9  | Yes             | 0.0013            |            |
| Control Fluoxetine vs. POMC-Cre/fl1A Vehicle       | 1353                       | 845.2 to 1861    | Yes             | < 0.0001          |            |
| Control Fluoxetine vs. POMC-Cre/fl1A Fluoxetine    | 578                        | 69.92 to 1086    | Yes             | 0.0212            |            |
| POMC-Cre/fl1A Vehicle vs. POMC-Cre/fl1A Fluoxetine | -775.3                     | -1283 to -267.2  | Yes             | 0.0015            |            |

| Figure Number<br>5F                                    | Test Used<br>Two-Way ANOVA | n<br>8 per group |                 |                    |            |
|--------------------------------------------------------|----------------------------|------------------|-----------------|--------------------|------------|
| Figure 5F ANOVA TABLE                                  | Sum of Squares             | DF               | Mean of Squares | F (DFn, DFd)       | P value    |
| Interaction                                            | 488.6                      | 2                | 244.3           | F (2, 42) = 0.1382 | P = 0.8713 |
| Pretreatment                                           | 526.7                      | 1                | 526.7           | F (1, 42) = 0.2979 | P = 0.5881 |
| Treatment                                              | 378664                     | 2                | 189332          | F (2, 42) = 107.1  | P < 0.0001 |
| Residual                                               | 74264                      | 42               | 1768            |                    |            |
| INTERACTION NOT SIGNIFICANT -- NO MULTIPLE COMPARISONS |                            |                  |                 |                    |            |

| Figure Number<br>5G                                    | Test Used<br>Two-Way ANOVA | n<br>8 per group |                 |                    |            |
|--------------------------------------------------------|----------------------------|------------------|-----------------|--------------------|------------|
| Figure 5G ANOVA TABLE                                  | Sum of Squares             | DF               | Mean of Squares | F (DFn, DFd)       | P value    |
| Interaction                                            | 1.29E+06                   | 2                | 644786          | F (2, 42) = 0.9504 | P = 0.3947 |
| Pretreatment                                           | 109634                     | 1                | 109634          | F (1, 42) = 0.1616 | P = 0.6897 |
| Treatment                                              | 3.19E+08                   | 2                | 1.60E+08        | F (2, 42) = 235.1  | P < 0.0001 |
| Residual                                               | 2.85E+07                   | 42               | 678432          |                    |            |
| INTERACTION NOT SIGNIFICANT -- NO MULTIPLE COMPARISONS |                            |                  |                 |                    |            |

| Figure Number<br>5H                                    | Test Used<br>Two-Way ANOVA | n<br>8 per group |                 |                      |            |
|--------------------------------------------------------|----------------------------|------------------|-----------------|----------------------|------------|
| Figure 5H ANOVA TABLE                                  | Sum of Squares             | DF               | Mean of Squares | F (DFn, DFd)         | P value    |
| Interaction                                            | 3344                       | 2                | 1672            | F (2, 42) = 0.007296 | P = 0.9927 |
| Pretreatment                                           | 8454                       | 1                | 8454            | F (1, 42) = 0.03688  | P = 0.8486 |
| Treatment                                              | 7.87E+07                   | 2                | 3.94E+07        | F (2, 42) = 171.8    | P < 0.0001 |
| Residual                                               | 9.63E+06                   | 42               | 229190          |                      |            |
| INTERACTION NOT SIGNIFICANT -- NO MULTIPLE COMPARISONS |                            |                  |                 |                      |            |



| Figure Number                         | Test Used      | n           |                  |                   |                  |
|---------------------------------------|----------------|-------------|------------------|-------------------|------------------|
| 5J                                    | Two-Way ANOVA  | 8 per group |                  |                   |                  |
| Figure 5J ANOVA TABLE                 | Sum of Squares | DF          | Mean of Squares  | F (DFn, DFd)      | P value          |
| Interaction                           | 26450          | 1           | 26450            | F (1, 28) = 23.70 | P < 0.0001       |
| Genotype                              | 23762          | 1           | 23762            | F (1, 28) = 21.29 | P < 0.0001       |
| Treatment                             | 25313          | 1           | 25313            | F (1, 28) = 22.68 | P < 0.0001       |
| Residual                              | 31249          | 28          | 1116             |                   |                  |
| Figure 5J Multiple Comparisons        |                |             |                  |                   |                  |
| Tukey's multiple comparisons test     |                | Mean Diff.  | 95% CI of diff.  | Significant?      | Adjusted P Value |
| 1A KO Vehicle vs 1A KO Fluoxetine     |                | 1.25        | -44.36 to 46.86  | No                | 0.9998           |
| 1A KO Vehicle vs DG-1A+ Vehicle       |                | 3           | -42.61 to 48.61  | No                | 0.9979           |
| 1A KO Vehicle vs DG-1A+ Fluoxetine    |                | -110.8      | -156.4 to -65.14 | Yes               | < 0.0001         |
| 1A KO Fluoxetine vs DG-1A+ Vehicle    |                | 1.75        | -43.86 to 47.36  | No                | 0.9996           |
| 1A KO Fluoxetine vs DG-1A+ Fluoxetine |                | -112        | -157.6 to -66.39 | Yes               | < 0.0001         |
| DG-1A+ Vehicle vs DG-1A+ Fluoxetine   |                | -113.8      | -159.4 to -68.14 | Yes               | < 0.0001         |

| Figure Number                         | Test Used      | n           |                 |                   |                  |
|---------------------------------------|----------------|-------------|-----------------|-------------------|------------------|
| 5K                                    | Two-Way ANOVA  | 8 per group |                 |                   |                  |
| Figure 5K ANOVA TABLE                 | Sum of Squares | DF          | Mean of Squares | F (DFn, DFd)      | P value          |
| Interaction                           | 2.25E+06       | 1           | 2.25E+06        | F (1, 28) = 6.311 | P = 0.0180       |
| Genotype                              | 1.23E+06       | 1           | 1.23E+06        | F (1, 28) = 3.458 | P = 0.0735       |
| Treatment                             | 4.11E+06       | 1           | 4.11E+06        | F (1, 28) = 11.52 | P = 0.0021       |
| Residual                              | 9.99E+06       | 28          | 356910          |                   |                  |
| Figure 5K Multiple Comparisons        |                |             |                 |                   |                  |
| Tukey's multiple comparisons test     |                | Mean Diff.  | 95% CI of diff. | Significant?      | Adjusted P Value |
| 1A KO Vehicle vs 1A KO Fluoxetine     |                | -186.3      | -1002 to 629.3  | No                | 0.9237           |
| 1A KO Vehicle vs DG-1A+ Vehicle       |                | 137.9       | -677.7 to 953.4 | No                | 0.9668           |
| 1A KO Vehicle vs DG-1A+ Fluoxetine    |                | -1110       | -1925 to -294.1 | Yes               | 0.0047           |
| 1A KO Fluoxetine vs DG-1A+ Vehicle    |                | 324.1       | -491.4 to 1140  | No                | 0.7013           |
| 1A KO Fluoxetine vs DG-1A+ Fluoxetine |                | -923.4      | -1739 to -107.8 | Yes               | 0.0219           |
| DG-1A+ Vehicle vs DG-1A+ Fluoxetine   |                | -1248       | -2063 to -431.9 | Yes               | 0.0014           |

| Figure Number                      | Test Used      | n           |                  |                   |                  |
|------------------------------------|----------------|-------------|------------------|-------------------|------------------|
| 5L                                 | Two-Way ANOVA  | 8 per group |                  |                   |                  |
| Figure 5L ANOVA TABLE              | Sum of Squares | DF          | Mean of Squares  | F (DFn, DFd)      | P value          |
| Interaction                        | 251518         | 1           | 251518           | F (1, 28) = 8.031 | P = 0.0084       |
| Genotype                           | 255077         | 1           | 255077           | F (1, 28) = 8.144 | P = 0.0080       |
| Treatment                          | 145935         | 1           | 145935           | F (1, 28) = 4.659 | P = 0.0396       |
| Residual                           | 876965         | 28          | 31320            |                   |                  |
| Figure 5L Multiple Comparisons     |                |             |                  |                   |                  |
| Tukey's multiple comparisons test  |                | Mean Diff.  | 95% CI of diff.  | Significant?      | Adjusted P Value |
| 1A KO Vehicle vs 1A KO Fluoxetine  |                | 42.25       | -199.3 to 283.8  | No                | 0.9634           |
| 1A KO Vehicle vs DG-1A+ Vehicle    |                | -1.25       | -242.8 to 240.3  | No                | > 0.9999         |
| 1A KO Vehicle vs DG-1A+ Fluoxetine |                | -313.6      | -555.2 to -72.03 | Yes               | 0.0072           |
| 1A KO Fluoxetine vs DG-1A+ Vehicle |                | -43.5       | -285.1 to 198.1  | No                | 0.9603           |

|                                       |        |                  |     |        |
|---------------------------------------|--------|------------------|-----|--------|
| 1A KO Fluoxetine vs DG-1A+ Fluoxetine | -355.9 | -597.5 to -114.3 | Yes | 0.0021 |
| DG-1A+ Vehicle vs DG-1A+ Fluoxetine   | -312.4 | -554.0 to -70.78 | Yes | 0.0075 |

| Figure Number                                          | Test Used      | n           |                 |                      |            |
|--------------------------------------------------------|----------------|-------------|-----------------|----------------------|------------|
| 6B                                                     | Two-Way ANOVA  | 6 per group |                 |                      |            |
| Figure 6B ANOVA TABLE                                  | Sum of Squares | DF          | Mean of Squares | F (DFn, DFd)         | P value    |
| Interaction                                            | 4.905          | 1           | 4.905           | F (1, 20) = 0.005228 | P = 0.9431 |
| Genotype                                               | 84.49          | 1           | 84.49           | F (1, 20) = 0.09005  | P = 0.7672 |
| Treatment                                              | 3667           | 1           | 3667            | F (1, 20) = 3.908    | P = 0.0620 |
| Residual                                               | 18765          | 20          | 938.2           |                      |            |
| INTERACTION NOT SIGNIFICANT -- NO MULTIPLE COMPARISONS |                |             |                 |                      |            |

| Figure Number                                      | Test Used      | n                |                 |                   |            |
|----------------------------------------------------|----------------|------------------|-----------------|-------------------|------------|
| 6C                                                 | Two-Way ANOVA  | 6 per group      |                 |                   |            |
| Figure 6C ANOVA TABLE                              | Sum of Squares | DF               | Mean of Squares | F (DFn, DFd)      | P value    |
| Interaction                                        | 34594          | 1                | 34594           | F (1, 20) = 5.585 | P = 0.0284 |
| Genotype                                           | 66543          | 1                | 66543           | F (1, 20) = 10.74 | P = 0.0038 |
| Treatment                                          | 40459          | 1                | 40459           | F (1, 20) = 6.531 | P = 0.0188 |
| Residual                                           | 123891         | 20               | 6195            |                   |            |
| Figure 6C Multiple Comparisons                     | Mean Diff.     | 95% CI of diff.  | Significant?    | Adjusted P Value  |            |
| Tukey's multiple comparisons test                  |                |                  |                 |                   |            |
| Control Vehicle vs Control Fluoxetine              | 158            | 30.86 to 285.2   | Yes             | 0.0117            |            |
| Control Vehicle vs POMC-Cre/fl1A Vehicle           | -29.38         | -156.6 to 97.81  | No              | 0.9155            |            |
| Control Vehicle vs. POMC-Cre/fl1A Fluoxetine       | -23.2          | -150.4 to 104.0  | No              | 0.9556            |            |
| Control Fluoxetine vs. POMC-Cre/fl1A Vehicle       | -187.4         | -314.6 to -60.24 | Yes             | 0.0027            |            |
| Control Fluoxetine vs. POMC-Cre/fl1A Fluoxetine    | -181.2         | -308.4 to -54.06 | Yes             | 0.0037            |            |
| POMC-Cre/fl1A Vehicle vs. POMC-Cre/fl1A Fluoxetine | 6.185          | -121.0 to 133.4  | No              | 0.9991            |            |

| Figure Number                                          | Test Used      | n           |                 |                      |            |
|--------------------------------------------------------|----------------|-------------|-----------------|----------------------|------------|
| 6E                                                     | Two-Way ANOVA  | 6 per group |                 |                      |            |
| Figure 6E ANOVA TABLE                                  | Sum of Squares | DF          | Mean of Squares | F (DFn, DFd)         | P value    |
| Interaction                                            | 2.847          | 2           | 1.423           | F (2, 30) = 0.006506 | P = 0.9935 |
| Genotype                                               | 38.67          | 1           | 38.67           | F (1, 30) = 0.1767   | P = 0.6772 |
| Treatment                                              | 1418           | 2           | 709             | F (2, 30) = 3.241    | P = 0.0532 |
| Residual                                               | 6564           | 30          | 218.8           |                      |            |
| INTERACTION NOT SIGNIFICANT -- NO MULTIPLE COMPARISONS |                |             |                 |                      |            |

| Figure Number         | Test Used      | n           |                 |                      |            |
|-----------------------|----------------|-------------|-----------------|----------------------|------------|
| 6F                    | Two-Way ANOVA  | 6 per group |                 |                      |            |
| Figure 6F ANOVA TABLE | Sum of Squares | DF          | Mean of Squares | F (DFn, DFd)         | P value    |
| Interaction           | 846.6          | 2           | 423.3           | F (2, 30) = 0.1473   | P = 0.8637 |
| Genotype              | 10.86          | 1           | 10.86           | F (1, 30) = 0.003777 | P = 0.9514 |
| Treatment             | 281787         | 2           | 140894          | F (2, 30) = 49.02    | P < 0.0001 |

|          |       |    |      |
|----------|-------|----|------|
| Residual | 86233 | 30 | 2874 |
|----------|-------|----|------|

INTERACTION NOT SIGNIFICANT -- NO MULTIPLE COMPARISONS

|                     |                            |                  |
|---------------------|----------------------------|------------------|
| Figure Number<br>6H | Test Used<br>Two-Way ANOVA | n<br>6 per group |
|---------------------|----------------------------|------------------|

|                       |                |    |                 |                      |            |
|-----------------------|----------------|----|-----------------|----------------------|------------|
| Figure 6H ANOVA TABLE | Sum of Squares | DF | Mean of Squares | F (DFn, DFd)         | P value    |
| Interaction           | 108.4          | 1  | 108.4           | F (1, 20) = 0.04255  | P = 0.8387 |
| Genotype              | 737            | 1  | 737             | F (1, 20) = 0.2894   | P = 0.5966 |
| Treatment             | 0.04167        | 1  | 0.04167         | F (1, 20) = 1.636E-5 | P = 0.9968 |
| Residual              | 50939          | 20 | 2547            |                      |            |

INTERACTION NOT SIGNIFICANT -- NO MULTIPLE COMPARISONS

|                     |                            |                  |
|---------------------|----------------------------|------------------|
| Figure Number<br>6I | Test Used<br>Two-Way ANOVA | n<br>6 per group |
|---------------------|----------------------------|------------------|

|                       |                |    |                 |                   |            |
|-----------------------|----------------|----|-----------------|-------------------|------------|
| Figure 6I ANOVA TABLE | Sum of Squares | DF | Mean of Squares | F (DFn, DFd)      | P value    |
| Interaction           | 25026          | 1  | 25026           | F (1, 20) = 8.878 | P = 0.0074 |
| Genotype              | 20126          | 1  | 20126           | F (1, 20) = 7.140 | P = 0.0146 |
| Treatment             | 13490          | 1  | 13490           | F (1, 20) = 4.786 | P = 0.0407 |
| Residual              | 56375          | 20 | 2819            |                   |            |

Figure 6I Multiple Comparisons

|                                       |            |                 |              |                  |
|---------------------------------------|------------|-----------------|--------------|------------------|
| Tukey's multiple comparisons test     | Mean Diff. | 95% CI of diff. | Significant? | Adjusted P Value |
| 1A KO Vehicle vs 1A KO Fluoxetine     | -17.17     | -103.0 to 68.63 | No           | 0.9427           |
| 1A KO Vehicle vs DG-1A+ Vehicle       | -6.667     | -92.46 to 79.13 | No           | 0.9962           |
| 1A KO Vehicle vs DG-1A+ Fluoxetine    | 105.3      | 19.54 to 191.1  | Yes          | 0.0128           |
| 1A KO Fluoxetine vs DG-1A+ Vehicle    | 10.5       | -75.29 to 96.29 | No           | 0.9858           |
| 1A KO Fluoxetine vs DG-1A+ Fluoxetine | 122.5      | 36.71 to 208.3  | Yes          | 0.0036           |
| DG-1A+ Vehicle vs DG-1A+ Fluoxetine   | 112        | 26.21 to 197.8  | Yes          | 0.0079           |

|                     |                            |                  |
|---------------------|----------------------------|------------------|
| Figure Number<br>7B | Test Used<br>Two-Way ANOVA | n<br>3 per group |
|---------------------|----------------------------|------------------|

|                       |                |    |                 |                  |            |
|-----------------------|----------------|----|-----------------|------------------|------------|
| Figure 7B ANOVA TABLE | Sum of Squares | DF | Mean of Squares | F (DFn, DFd)     | P value    |
| Interaction           | 507            | 1  | 507             | F (1, 8) = 10.68 | P = 0.0114 |
| Genotype              | 337.1          | 1  | 337.1           | F (1, 8) = 7.102 | P = 0.0286 |
| Treatment             | 2369           | 1  | 2369            | F (1, 8) = 49.91 | P = 0.0001 |
| Residual              | 379.7          | 8  | 47.46           |                  |            |

Figure 7B Multiple Comparisons

|                                                    |            |                  |              |                  |
|----------------------------------------------------|------------|------------------|--------------|------------------|
| Tukey's multiple comparisons test                  | Mean Diff. | 95% CI of diff.  | Significant? | Adjusted P Value |
| Control Vehicle vs Control Fluoxetine              | -41.1      | -59.11 to -23.09 | Yes          | 0.0004           |
| Control Vehicle vs POMC-Cre/fl1A Vehicle           | -2.4       | -20.41 to 15.61  | No           | 0.9723           |
| Control Vehicle vs. POMC-Cre/fl1A Fluoxetine       | -17.5      | -35.51 to 0.5131 | No           | 0.0569           |
| Control Fluoxetine vs. POMC-Cre/fl1A Vehicle       | 38.7       | 20.69 to 56.71   | Yes          | 0.0006           |
| Control Fluoxetine vs. POMC-Cre/fl1A Fluoxetine    | 23.6       | 5.587 to 41.61   | Yes          | 0.0128           |
| POMC-Cre/fl1A Vehicle vs. POMC-Cre/fl1A Fluoxetine | -15.1      | -33.11 to 2.913  | No           | 0.1038           |

| Figure Number<br>7C                                                 | Test Used<br>Two-Way ANOVA | n<br>3 per group |                 |                  |            |
|---------------------------------------------------------------------|----------------------------|------------------|-----------------|------------------|------------|
| Figure 7C ANOVA TABLE                                               | Sum of Squares             | DF               | Mean of Squares | F (DFn, DFd)     | P value    |
| Interaction                                                         | 255.8                      | 1                | 255.8           | F (1, 8) = 6.749 | P = 0.0317 |
| Genotype                                                            | 250.3                      | 1                | 250.3           | F (1, 8) = 6.604 | P = 0.0331 |
| Treatment                                                           | 2431                       | 1                | 2431            | F (1, 8) = 64.15 | P < 0.0001 |
| Residual                                                            | 303.2                      | 8                | 37.9            |                  |            |
| Figure 7C Multiple Comparisons<br>Tukey's multiple comparisons test | Mean Diff.                 | 95% CI of diff.  | Significant?    | Adjusted P Value |            |
| Control Vehicle vs Control Fluoxetine                               | -37.7                      | -53.80 to -21.60 | Yes             | 0.0003           |            |
| Control Vehicle vs POMC-Cre/fl1A Vehicle                            | -0.1                       | -16.20 to 16.00  | No              | > 0.9999         |            |
| Control Vehicle vs. POMC-Cre/fl1A Fluoxetine                        | -19.33                     | -35.43 to -3.237 | Yes             | 0.0205           |            |
| Control Fluoxetine vs. POMC-Cre/fl1A Vehicle                        | 37.6                       | 21.50 to 53.70   | Yes             | 0.0003           |            |
| Control Fluoxetine vs. POMC-Cre/fl1A Fluoxetine                     | 18.37                      | 2.271 to 34.46   | Yes             | 0.0266           |            |
| POMC-Cre/fl1A Vehicle vs. POMC-Cre/fl1A Fluoxetine                  | -19.23                     | -35.33 to -3.137 | Yes             | 0.021            |            |

| Figure Number<br>Supplementary 1B<br>Comparisons                | Test Used<br>Kaplan-Meier Survival Analysis with Bonferroni correction and Mantel-Cox p-values |          |              | n                                                                                          |
|-----------------------------------------------------------------|------------------------------------------------------------------------------------------------|----------|--------------|--------------------------------------------------------------------------------------------|
| 4 Total Comparisons, so .05/4=0.0125; p<0.0125 for significance |                                                                                                |          |              | 16 for WT Vehicle<br>16 for WT Fluoxetine<br>17 for fl1A Vehicle<br>17 for fl1A Fluoxetine |
| Comparison                                                      | Chi-Square                                                                                     | P-Value  | Significant? |                                                                                            |
| WT Vehicle vs WT Fluoxetine                                     | 14.666                                                                                         | 0.0001   | Yes          |                                                                                            |
| fl1A Vehicle vs fl1A Fluoxetine                                 | 20.804                                                                                         | < 0.0001 | Yes          |                                                                                            |
| WT Vehicle vs fl1A Vehicle                                      | 0.018                                                                                          | 0.8937   | No           |                                                                                            |
| WT Fluoxetine vs fl1A Fluoxetine                                | 0.041                                                                                          | 0.8393   | No           |                                                                                            |

| Figure Number<br>Supplementary 1C - % Weight Loss      | Test Used<br>Two-Way ANOVA | n<br>16 for WT Vehicle<br>16 for WT Fluoxetine<br>17 for fl1A Vehicle<br>17 for fl1A Fluoxetine |                 |                      |         |
|--------------------------------------------------------|----------------------------|-------------------------------------------------------------------------------------------------|-----------------|----------------------|---------|
| Supplementary 1C - % Weight Loss ANOVA TABLE           | Sum of Squares             | DF                                                                                              | Mean of Squares | F (DFn, DFd)         | P value |
| Interaction                                            | 7.86E-05                   | 1                                                                                               | 7.86E-05        | F (1, 62) = 6.598E-5 | 0.9935  |
| Genotype                                               | 0.011                      | 1                                                                                               | 0.011           | F (1, 62) = 0.009    | 0.9239  |
| Treatment                                              | 0.108                      | 1                                                                                               | 0.108           | F (1, 62) = 0.091    | 0.764   |
| Residual                                               | 73.876                     | 62                                                                                              | 1.192           |                      |         |
| INTERACTION NOT SIGNIFICANT -- NO MULTIPLE COMPARISONS |                            |                                                                                                 |                 |                      |         |

| Figure Number<br>Supplementary 1C - Consumption | Test Used<br>Two-Way ANOVA | n<br>16 for WT Vehicle<br>16 for WT Fluoxetine<br>17 for fl1A Vehicle<br>17 for fl1A Fluoxetine |  |  |  |
|-------------------------------------------------|----------------------------|-------------------------------------------------------------------------------------------------|--|--|--|
|-------------------------------------------------|----------------------------|-------------------------------------------------------------------------------------------------|--|--|--|

| Figure Number                              | Test Used       | n                                                                                          |
|--------------------------------------------|-----------------|--------------------------------------------------------------------------------------------|
| Supplementary 1C - Consumption ANOVA TABLE | Two-Way ANOVA   | 16 for WT Vehicle<br>16 for WT Fluoxetine<br>17 for fl1A Vehicle<br>17 for fl1A Fluoxetine |
| Interaction                                | Sum of Squares  | DF                                                                                         |
| Genotype                                   | Mean of Squares | F (DFn, DFd)                                                                               |
| Treatment                                  | P value         |                                                                                            |
| Residual                                   |                 |                                                                                            |

INTERACTION NOT SIGNIFICANT -- NO MULTIPLE COMPARISONS

| Figure Number                                   | Test Used       | n                                                                                          |
|-------------------------------------------------|-----------------|--------------------------------------------------------------------------------------------|
| Supplementary 1D - Open Arm Entries             | Two-Way ANOVA   | 16 for WT Vehicle<br>16 for WT Fluoxetine<br>17 for fl1A Vehicle<br>17 for fl1A Fluoxetine |
| Supplementary 1D - Open Arm Entries ANOVA TABLE | Sum of Squares  | DF                                                                                         |
| Interaction                                     | Mean of Squares | F (DFn, DFd)                                                                               |
| Genotype                                        | P value         |                                                                                            |
| Treatment                                       |                 |                                                                                            |
| Residual                                        |                 |                                                                                            |

INTERACTION NOT SIGNIFICANT -- NO MULTIPLE COMPARISONS

| Figure Number                                    | Test Used       | n                                                                                          |
|--------------------------------------------------|-----------------|--------------------------------------------------------------------------------------------|
| Supplementary 1D - Open Arm Duration             | Two-Way ANOVA   | 16 for WT Vehicle<br>16 for WT Fluoxetine<br>17 for fl1A Vehicle<br>17 for fl1A Fluoxetine |
| Supplementary 1D - Open Arm Duration ANOVA TABLE | Sum of Squares  | DF                                                                                         |
| Interaction                                      | Mean of Squares | F (DFn, DFd)                                                                               |
| Genotype                                         | P value         |                                                                                            |
| Treatment                                        |                 |                                                                                            |
| Residual                                         |                 |                                                                                            |

INTERACTION NOT SIGNIFICANT -- NO MULTIPLE COMPARISONS

| Figure Number                | Test Used       | n                                                                                          |
|------------------------------|-----------------|--------------------------------------------------------------------------------------------|
| Supplementary 1E             | Two-Way ANOVA   | 16 for WT Vehicle<br>16 for WT Fluoxetine<br>17 for fl1A Vehicle<br>17 for fl1A Fluoxetine |
| Supplementary 1E ANOVA TABLE | Sum of Squares  | DF                                                                                         |
| Interaction                  | Mean of Squares | F (DFn, DFd)                                                                               |
| Genotype                     | P value         |                                                                                            |
| Treatment                    |                 |                                                                                            |
| Residual                     |                 |                                                                                            |

INTERACTION NOT SIGNIFICANT -- NO MULTIPLE COMPARISONS

| Figure Number<br>Supplementary 1F                      | Test Used<br>Two-Way ANOVA | n<br>8 per group |                 |                     |          |
|--------------------------------------------------------|----------------------------|------------------|-----------------|---------------------|----------|
| Supplementary 1F ANOVA TABLE                           | Sum of Squares             | DF               | Mean of Squares | F (DFn, DFd)        | P value  |
| Interaction                                            | 371.281                    | 1                | 371.281         | F (1, 28) = 0.148   | 0.7038   |
| Genotype                                               | 16.531                     | 1                | 16.531          | F (1, 28) = 0.007   | 0.936    |
| Treatment                                              | 601430.281                 | 1                | 601430.281      | F (1, 28) = 239.002 | < 0.0001 |
| Residual                                               | 70459.875                  | 28               | 2516.424        |                     |          |
| INTERACTION NOT SIGNIFICANT -- NO MULTIPLE COMPARISONS |                            |                  |                 |                     |          |

| Figure Number<br>Supplementary 1G                      | Test Used<br>Two-Way ANOVA | n<br>8 per group |                 |                    |          |
|--------------------------------------------------------|----------------------------|------------------|-----------------|--------------------|----------|
| Supplementary 1G ANOVA TABLE                           | Sum of Squares             | DF               | Mean of Squares | F (DFn, DFd)       | P value  |
| Interaction                                            | 18963.781                  | 1                | 18963.781       | F (1, 28) = 0.027  | 0.871    |
| Genotype                                               | 7657.031                   | 1                | 7657.031        | F (1, 28) = 0.011  | 0.9178   |
| Treatment                                              | 69092951.28                | 1                | 69092951.28     | F (1, 28) = 97.857 | < 0.0001 |
| Residual                                               | 19769689.88                | 28               | 706060.031      |                    |          |
| INTERACTION NOT SIGNIFICANT -- NO MULTIPLE COMPARISONS |                            |                  |                 |                    |          |

| Figure Number<br>Supplementary 1H                      | Test Used<br>Two-Way ANOVA | n<br>8 per group |                 |                     |          |
|--------------------------------------------------------|----------------------------|------------------|-----------------|---------------------|----------|
| Supplementary 1H ANOVA TABLE                           | Sum of Squares             | DF               | Mean of Squares | F (DFn, DFd)        | P value  |
| Interaction                                            | 1845.281                   | 1                | 1845.281        | F (1, 28) = 0.022   | 0.8844   |
| Genotype                                               | 2363.281                   | 1                | 2363.281        | F (1, 28) = 0.028   | 0.8694   |
| Treatment                                              | 15544494.03                | 1                | 15544494.03     | F (1, 28) = 181.216 | < 0.0001 |
| Residual                                               | 2401808.625                | 28               | 85778.879       |                     |          |
| INTERACTION NOT SIGNIFICANT -- NO MULTIPLE COMPARISONS |                            |                  |                 |                     |          |

| Figure Number<br>Supplementary 2B - % Weight Loss      | Test Used<br>Two-Way ANOVA | n<br>27 for Control Vehicle<br>26 for Control Fluoxetine<br>19 for POMC-Cre/fl1A Vehicle<br>21 for POMC-Cre/fl1A Fluoxetine |                 |                   |         |
|--------------------------------------------------------|----------------------------|-----------------------------------------------------------------------------------------------------------------------------|-----------------|-------------------|---------|
| Supplementary 2B - % Weight Loss ANOVA TABLE           | Sum of Squares             | DF                                                                                                                          | Mean of Squares | F (DFn, DFd)      | P value |
| Interaction                                            | 0.036                      | 1                                                                                                                           | 0.036           | F (1, 89) = 0.012 | 0.912   |
| Genotype                                               | 0.466                      | 1                                                                                                                           | 0.466           | F (1, 89) = 0.158 | 0.6922  |
| Treatment                                              | 0.111                      | 1                                                                                                                           | 0.111           | F (1, 89) = 0.038 | 0.8467  |
| Residual                                               | 262.689                    | 89                                                                                                                          | 2.952           |                   |         |
| INTERACTION NOT SIGNIFICANT -- NO MULTIPLE COMPARISONS |                            |                                                                                                                             |                 |                   |         |

| Figure Number | Test Used | n |
|---------------|-----------|---|
|---------------|-----------|---|

| Figure Number                  | Test Used     | n                                                                                                                      |
|--------------------------------|---------------|------------------------------------------------------------------------------------------------------------------------|
| Supplementary 2B - Consumption | Two-Way ANOVA | 27 for Control Vehicle<br>26 for Control Fluoxetine<br>19 for POMC-Cre/fl1A Vehicle<br>21 for POMC-Cre/fl1A Fluoxetine |

  

| Supplementary 2B - Consumption ANOVA TABLE | Sum of Squares | DF | Mean of Squares | F (DFn, DFd)      | P value |
|--------------------------------------------|----------------|----|-----------------|-------------------|---------|
| Interaction                                | 2.93E-07       | 1  | 2.93E-07        | F (1, 89) = 0.024 | 0.877   |
| Genotype                                   | 7.78E-07       | 1  | 7.78E-07        | F (1, 89) = 0.064 | 0.8009  |
| Treatment                                  | 6.46E-08       | 1  | 6.46E-08        | F (1, 89) = 0.005 | 0.9421  |
| Residual                                   | 0.001          | 89 | 1.22E-05        |                   |         |

INTERACTION NOT SIGNIFICANT -- NO MULTIPLE COMPARISONS

| Figure Number                    | Test Used     | n                                                                                                                                                              |
|----------------------------------|---------------|----------------------------------------------------------------------------------------------------------------------------------------------------------------|
| Supplementary 2D - % Weight Loss | Two-Way ANOVA | 14 for AAV8-CamKII-GFP/fl1A Vehicle<br>14 for AAV8-CamKII-GFP/fl1A Fluoxetine<br>14 for AAV8-CamKII-Cre/fl1A Vehicle<br>16 for AAV8-CamKII-Cre/fl1A Fluoxetine |

  

| Supplementary 2D - % Weight Loss ANOVA TABLE | Sum of Squares | DF | Mean of Squares | F (DFn, DFd)      | P value |
|----------------------------------------------|----------------|----|-----------------|-------------------|---------|
| Interaction                                  | 1.577          | 1  | 1.577           | F (1, 54) = 1.684 | 0.1999  |
| Virus                                        | 1.411          | 1  | 1.411           | F (1, 54) = 1.507 | 0.2249  |
| Treatment                                    | 1.023          | 1  | 1.023           | F (1, 54) = 1.092 | 0.3006  |
| Residual                                     | 50.571         | 54 | 0.937           |                   |         |

INTERACTION NOT SIGNIFICANT -- NO MULTIPLE COMPARISONS

| Figure Number                  | Test Used     | n                                                                                                                                                              |
|--------------------------------|---------------|----------------------------------------------------------------------------------------------------------------------------------------------------------------|
| Supplementary 2D - Consumption | Two-Way ANOVA | 14 for AAV8-CamKII-GFP/fl1A Vehicle<br>14 for AAV8-CamKII-GFP/fl1A Fluoxetine<br>14 for AAV8-CamKII-Cre/fl1A Vehicle<br>16 for AAV8-CamKII-Cre/fl1A Fluoxetine |

  

| Supplementary 2D - Consumption ANOVA TABLE | Sum of Squares | DF | Mean of Squares | F (DFn, DFd)      | P value |
|--------------------------------------------|----------------|----|-----------------|-------------------|---------|
| Interaction                                | 1.25E-06       | 1  | 1.25E-06        | F (1, 54) = 1.247 | 0.269   |
| Virus                                      | 4.54E-07       | 1  | 4.54E-07        | F (1, 54) = 0.453 | 0.5039  |
| Treatment                                  | 7.94E-07       | 1  | 7.94E-07        | F (1, 54) = 0.792 | 0.3776  |
| Residual                                   | 5.42E-05       | 54 |                 |                   |         |

INTERACTION NOT SIGNIFICANT -- NO MULTIPLE COMPARISONS

| Figure Number                    | Test Used     | n            |
|----------------------------------|---------------|--------------|
| Supplementary 2F - % Weight Loss | Two-Way ANOVA | 15 per group |

  

| Supplementary 2F - % Weight Loss ANOVA TABLE | Sum of Squares | DF | Mean of Squares | F (DFn, DFd)      | P value |
|----------------------------------------------|----------------|----|-----------------|-------------------|---------|
| Interaction                                  | 0.102          | 2  | 0.051           | F (2, 84) = 0.018 | 0.9821  |
| Pretreatment                                 | 0.908          | 1  | 0.908           | F (1, 84) = 0.321 | 0.5725  |
| Treatment                                    | 0.347          | 2  | 0.174           | F (2, 84) = 0.061 | 0.9405  |
| Residual                                     | 237.589        | 84 | 2.828           |                   |         |

INTERACTION NOT SIGNIFICANT -- NO MULTIPLE COMPARISONS

| Figure Number                                          | Test Used      | n            |                 |                   |         |
|--------------------------------------------------------|----------------|--------------|-----------------|-------------------|---------|
| Supplementary 2F - Consumption                         | Two-Way ANOVA  | 15 per group |                 |                   |         |
| Supplementary 2F - Consumption ANOVA TABLE             | Sum of Squares | DF           | Mean of Squares | F (DFn, DFd)      | P value |
| Interaction                                            | 2.67E-07       | 2            | 1.33E-07        | F (2, 84) = 0.011 | 0.9894  |
| Pretreatment                                           | 1.60E-06       | 1            | 1.60E-06        | F (1, 84) = 0.128 | 0.7214  |
| Treatment                                              | 1.16E-06       | 2            | 5.78E-07        | F (2, 84) = 0.046 | 0.9549  |
| Residual                                               | 0.001          | 84           | 1.25E-05        |                   |         |
| INTERACTION NOT SIGNIFICANT -- NO MULTIPLE COMPARISONS |                |              |                 |                   |         |

| Figure Number                                          | Test Used      | n                                                                                                    |                 |                   |         |
|--------------------------------------------------------|----------------|------------------------------------------------------------------------------------------------------|-----------------|-------------------|---------|
| Supplementary 2H - % Weight Loss                       | Two-Way ANOVA  | 17 for 1A KO Vehicle<br>15 for 1A KO Fluoxetine<br>13 for DG-1A+ Vehicle<br>17 for DG-1A+ Fluoxetine |                 |                   |         |
| Supplementary 2H - % Weight Loss ANOVA TABLE           | Sum of Squares | DF                                                                                                   | Mean of Squares | F (DFn, DFd)      | P value |
| Interaction                                            | 0.088          | 1                                                                                                    | 0.088           | F (1, 58) = 0.023 | 0.8798  |
| Genotype                                               | 0.02           | 1                                                                                                    | 0.02            | F (1, 58) = 0.005 | 0.9419  |
| Treatment                                              | 0.017          | 1                                                                                                    | 0.017           | F (1, 58) = 0.004 | 0.9474  |
| Residual                                               | 220.766        | 58                                                                                                   | 3.806           |                   |         |
| INTERACTION NOT SIGNIFICANT -- NO MULTIPLE COMPARISONS |                |                                                                                                      |                 |                   |         |

| Figure Number                                          | Test Used      | n                                                                                                    |                 |                       |         |
|--------------------------------------------------------|----------------|------------------------------------------------------------------------------------------------------|-----------------|-----------------------|---------|
| Supplementary 2H - Consumption                         | Two-Way ANOVA  | 17 for 1A KO Vehicle<br>15 for 1A KO Fluoxetine<br>13 for DG-1A+ Vehicle<br>17 for DG-1A+ Fluoxetine |                 |                       |         |
| Supplementary 2H - Consumption ANOVA TABLE             | Sum of Squares | DF                                                                                                   | Mean of Squares | F (DFn, DFd)          | P value |
| Interaction                                            | 1.91E-07       | 1                                                                                                    | 1.91E-07        | F (1, 58) = 0.016     | 0.9002  |
| Genotype                                               | 5.30E-10       | 1                                                                                                    | 5.30E-10        | F (1, 58) = 4.3975E-5 | 0.9947  |
| Treatment                                              | 2.52E-06       | 1                                                                                                    | 2.52E-06        | F (1, 58) = 0.209     | 0.649   |
| Residual                                               | 0.001          | 58                                                                                                   |                 |                       |         |
| INTERACTION NOT SIGNIFICANT -- NO MULTIPLE COMPARISONS |                |                                                                                                      |                 |                       |         |

| Figure Number                                                    | Test Used                                                                         | n            |              |  |
|------------------------------------------------------------------|-----------------------------------------------------------------------------------|--------------|--------------|--|
| Supplementary 4B Comparisons                                     | Kaplan-Meier Survival Analysis with Bonferroni correction and Mantel-Cox p-values | 15 per group |              |  |
| 4 Total Comparisons, so .05/4=.0125; p<0.0125 for significance   |                                                                                   |              |              |  |
| Comparison (All Mice are Nestin-CreER)                           | Chi-Square                                                                        | P-Value      | Significant? |  |
| Vehicle Vehicle vs Vehicle Fluoxetine (8 wks)                    | 13.631                                                                            | 0.0002       | Yes          |  |
| Tamoxifen (8 wks) Vehicle vs Tamoxifen (8wks) Fluoxetine (8 wks) | 19.787                                                                            | < 0.0001     | Yes          |  |
| Vehicle Vehicle vs Tamoxifen (8 wks) Vehicle                     | 0.099                                                                             | 0.7533       | No           |  |



Vehicle Fluoxetine (8 wks) vs Tamoxifen (8 wks) Fluoxetine (8 wks)

0.44

0.5073

No

| Figure Number                                          | Test Used      | n            |                 |                   |         |
|--------------------------------------------------------|----------------|--------------|-----------------|-------------------|---------|
| Supplementary 4C - % Weight Loss                       | Two-Way ANOVA  | 15 per group |                 |                   |         |
| Supplementary 4C - % Weight Loss ANOVA TABLE           | Sum of Squares | DF           | Mean of Squares | F (DFn, DFd)      | P value |
| Interaction                                            | 0.819          | 1            | 0.819           | F (1, 56) = 0.244 | 0.6235  |
| Pretreatment                                           | 0.023          | 1            | 0.023           | F (1, 56) = 0.007 | 0.9346  |
| Treatment                                              | 0.098          | 1            | 0.098           | F (1, 56) = 0.029 | 0.8647  |
| Residual                                               | 188.215        | 56           | 3.361           |                   |         |
| INTERACTION NOT SIGNIFICANT -- NO MULTIPLE COMPARISONS |                |              |                 |                   |         |

| Figure Number                                          | Test Used      | n            |                 |                   |         |
|--------------------------------------------------------|----------------|--------------|-----------------|-------------------|---------|
| Supplementary 4C - Consumption                         | Two-Way ANOVA  | 15 per group |                 |                   |         |
| Supplementary 4C - Consumption ANOVA TABLE             | Sum of Squares | DF           | Mean of Squares | F (DFn, DFd)      | P value |
| Interaction                                            | 1.50E-07       | 1            | 1.50E-07        | F (1, 56) = 0.015 | 0.9015  |
| Pretreatment                                           | 1.50E-07       | 1            | 1.50E-07        | F (1, 56) = 0.015 | 0.9015  |
| Treatment                                              | 4.17E-07       | 1            | 4.17E-07        | F (1, 56) = 0.043 | 0.8366  |
| Residual                                               | 0.001          | 56           | 9.71E-06        |                   |         |
| INTERACTION NOT SIGNIFICANT -- NO MULTIPLE COMPARISONS |                |              |                 |                   |         |

| Figure Number                                          | Test Used      | n            |                 |                    |          |
|--------------------------------------------------------|----------------|--------------|-----------------|--------------------|----------|
| Supplementary 4D - Open Arm Entries                    | Two-Way ANOVA  | 15 per group |                 |                    |          |
| Supplementary 4D - Open Arm Entries ANOVA TABLE        | Sum of Squares | DF           | Mean of Squares | F (DFn, DFd)       | P value  |
| Interaction                                            | 0.15           | 1            | 0.15            | F (1, 56) = 0.013  | 0.9102   |
| Pretreatment                                           | 1.35           | 1            | 1.35            | F (1, 56) = 0.116  | 0.7352   |
| Treatment                                              | 220.417        | 1            | 220.417         | F (1, 56) = 18.866 | < 0.0001 |
| Residual                                               | 654.267        | 56           | 11.683          |                    |          |
| INTERACTION NOT SIGNIFICANT -- NO MULTIPLE COMPARISONS |                |              |                 |                    |          |

| Figure Number                                          | Test Used      | n            |                 |                    |          |
|--------------------------------------------------------|----------------|--------------|-----------------|--------------------|----------|
| Supplementary 4D - Open Arm Duration                   | Two-Way ANOVA  | 15 per group |                 |                    |          |
| Supplementary 4D - Open Arm Duration ANOVA TABLE       | Sum of Squares | DF           | Mean of Squares | F (DFn, DFd)       | P value  |
| Interaction                                            | 4.988          | 1            | 4.988           | F (1, 56) = 0.012  | 0.9147   |
| Pretreatment                                           | 26.268         | 1            | 26.268          | F (1, 56) = 0.061  | 0.8058   |
| Treatment                                              | 37715.308      | 1            | 37715.308       | F (1, 56) = 87.619 | < 0.0001 |
| Residual                                               | 24105.005      | 56           | 430.447         |                    |          |
| INTERACTION NOT SIGNIFICANT -- NO MULTIPLE COMPARISONS |                |              |                 |                    |          |

| Figure Number    | Test Used     | n            |  |  |  |
|------------------|---------------|--------------|--|--|--|
| Supplementary 4E | Two-Way ANOVA | 15 per group |  |  |  |

|                  | Sum of Squares | DF | Mean of Squares | F (DFn, DFd)       | P value  |
|------------------|----------------|----|-----------------|--------------------|----------|
| Supplementary 4E |                |    |                 |                    |          |
| Interaction      | 135            | 1  | 135             | F (1, 56) = 0.112  | 0.7392   |
| Pretreatment     | 29.4           | 1  | 29.4            | F (1, 56) = 0.024  | 0.8765   |
| Treatment        | 107357.4       | 1  | 107357.4        | F (1, 56) = 89.029 | < 0.0001 |
| Residual         | 67528.933      | 56 | 1205.874        |                    |          |

INTERACTION NOT SIGNIFICANT -- NO MULTIPLE COMPARISONS

| Figure Number    | Test Used      | n           |                 |                    |          |
|------------------|----------------|-------------|-----------------|--------------------|----------|
| Supplementary 4F | Two-Way ANOVA  | 8 per group |                 |                    |          |
| Supplementary 4F | Sum of Squares | DF          | Mean of Squares | F (DFn, DFd)       | P value  |
| Interaction      | 63.281         | 1           | 63.281          | F (1, 28) = 0.009  | 0.9271   |
| Pretreatment     | 16.531         | 1           | 16.531          | F (1, 28) = 0.002  | 0.9627   |
| Treatment        | 320600.281     | 1           | 320600.281      | F (1, 28) = 43.228 | < 0.0001 |
| Residual         | 207659.875     | 28          | 7416.424        |                    |          |

INTERACTION NOT SIGNIFICANT -- NO MULTIPLE COMPARISONS

| Figure Number    | Test Used      | n           |                 |                     |          |
|------------------|----------------|-------------|-----------------|---------------------|----------|
| Supplementary 4G | Two-Way ANOVA  | 8 per group |                 |                     |          |
| Supplementary 4G | Sum of Squares | DF          | Mean of Squares | F (DFn, DFd)        | P value  |
| Interaction      | 140185.125     | 1           | 140185.125      | F (1, 28) = 0.093   | 0.7625   |
| Pretreatment     | 178802         | 1           | 178802          | F (1, 28) = 0.119   | 0.7329   |
| Treatment        | 269886144.5    | 1           | 269886144.5     | F (1, 28) = 179.305 | < 0.0001 |
| Residual         | 42145000.25    | 28          | 1505178.58      |                     |          |

INTERACTION NOT SIGNIFICANT -- NO MULTIPLE COMPARISONS

| Figure Number    | Test Used      | n           |                 |                     |          |
|------------------|----------------|-------------|-----------------|---------------------|----------|
| Supplementary 4H | Two-Way ANOVA  | 8 per group |                 |                     |          |
| Supplementary 4H | Sum of Squares | DF          | Mean of Squares | F (DFn, DFd)        | P value  |
| Interaction      | 4851.125       | 1           | 4851.125        | F (1, 28) = 0.015   | 0.9042   |
| Pretreatment     | 4371.125       | 1           | 4371.125        | F (1, 28) = 0.013   | 0.9091   |
| Treatment        | 63867602       | 1           | 63867602        | F (1, 28) = 194.001 | < 0.0001 |
| Residual         | 9217945.75     | 28          | 329212.348      |                     |          |

INTERACTION NOT SIGNIFICANT -- NO MULTIPLE COMPARISONS

| Figure Number                          | Test Used                                                                         | n            |              |  |  |
|----------------------------------------|-----------------------------------------------------------------------------------|--------------|--------------|--|--|
| Supplementary 7B                       | Kaplan-Meier Survival Analysis with Bonferroni correction and Mantel-Cox p-values | 15 per group |              |  |  |
| Comparisons                            | 4 Total Comparisons, so .05/4=.0125; p<0.0125 for significance                    |              |              |  |  |
| Comparison (All Mice are Nestin-CreER) | Chi-Square                                                                        | P-Value      | Significant? |  |  |
| WT Vehicle vs WT Fluoxetine            | 8.487                                                                             | 0.0036       | Yes          |  |  |

|                                   |       |          |     |
|-----------------------------------|-------|----------|-----|
| 1A KO Vehicle vs 1A KO Fluoxetine | 0.26  | 0.6098   | No  |
| WT Vehicle vs 1A KO Vehicle       | 7.81  | 0.0052   | Yes |
| WT Fluoxetine vs 1A KO Fluoxetine | 18.39 | < 0.0001 | Yes |

| Figure Number                                          | Test Used      | n            |                 |                   |         |
|--------------------------------------------------------|----------------|--------------|-----------------|-------------------|---------|
| Supplementary 7C - % Weight Loss                       | Two-Way ANOVA  | 15 per group |                 |                   |         |
| Supplementary 7C - % Weight Loss ANOVA TABLE           | Sum of Squares | DF           | Mean of Squares | F (DFn, DFd)      | P value |
| Interaction                                            | 0.005          | 1            | 0.005           | F (1, 56) = 0.004 | 0.9508  |
| Genotype                                               | 0.295          | 1            | 0.295           | F (1, 56) = 0.225 | 0.6371  |
| Treatment                                              | 0.011          | 1            | 0.011           | F (1, 56) = 0.008 | 0.9276  |
| Residual                                               | 73.508         | 56           | 1.313           |                   |         |
| INTERACTION NOT SIGNIFICANT -- NO MULTIPLE COMPARISONS |                |              |                 |                   |         |

| Figure Number                                          | Test Used      | n            |                 |                   |         |
|--------------------------------------------------------|----------------|--------------|-----------------|-------------------|---------|
| Supplementary 7C - Consumption                         | Two-Way ANOVA  | 15 per group |                 |                   |         |
| Supplementary 7C - Consumption ANOVA TABLE             | Sum of Squares | DF           | Mean of Squares | F (DFn, DFd)      | P value |
| Interaction                                            | 8.17E-07       | 1            | 8.17E-07        | F (1, 56) = 0.073 | 0.7877  |
| Genotype                                               | 1.50E-07       | 1            | 1.50E-07        | F (1, 56) = 0.013 | 0.9081  |
| Treatment                                              | 4.17E-07       | 1            | 4.17E-07        | F (1, 56) = 0.037 | 0.8475  |
| Residual                                               | 0.001          | 56           | 1.12E-05        |                   |         |
| INTERACTION NOT SIGNIFICANT -- NO MULTIPLE COMPARISONS |                |              |                 |                   |         |

| Figure Number                                                   | Test Used      | n            |                  |                   |                  |
|-----------------------------------------------------------------|----------------|--------------|------------------|-------------------|------------------|
| Supplementary 7D - Open Arm Entries                             | Two-Way ANOVA  | 15 per group |                  |                   |                  |
| Supplementary 7D - Open Arm Entries ANOVA TABLE                 | Sum of Squares | DF           | Mean of Squares  | F (DFn, DFd)      | P value          |
| Interaction                                                     | 228.2          | 1            | 228.2            | F (1, 56) = 10.21 | P = 0.0023       |
| Genotype                                                        | 1612           | 1            | 1612             | F (1, 56) = 72.14 | P < 0.0001       |
| Treatment                                                       | 205.4          | 1            | 205.4            | F (1, 56) = 9.190 | P = 0.0037       |
| Residual                                                        | 1251           | 56           | 22.35            |                   |                  |
| Supplementary Figure 7D - Open Arm Entries Multiple Comparisons |                |              |                  |                   |                  |
| Tukey's multiple comparisons test                               |                | Mean Diff.   | 95% CI of diff.  | Significant?      | Adjusted P Value |
| WT Vehicle vs WT Fluoxetine                                     |                | -7.6         | -12.17 to -3.030 | Yes               | 0.0003           |
| WT Vehicle vs 1A KO Vehicle                                     |                | 6.467        | 1.896 to 11.04   | Yes               | 0.0023           |
| WT Vehicle vs 1A KO Fluoxetine                                  |                | 6.667        | 2.096 to 11.24   | Yes               | 0.0016           |
| WT Fluoxetine vs 1A KO Vehicle                                  |                | 14.07        | 9.496 to 18.64   | Yes               | < 0.0001         |
| WT Fluoxetine vs 1A KO Fluoxetine                               |                | 14.27        | 9.696 to 18.84   | Yes               | < 0.0001         |
| 1A KO Vehicle vs 1A KO Fluoxetine                               |                | 0.2          | -4.370 to 4.770  | No                | 0.9994           |

| Figure Number                                    | Test Used      | n            |                 |                   |            |
|--------------------------------------------------|----------------|--------------|-----------------|-------------------|------------|
| Supplementary 7D - Open Arm Duration             | Two-Way ANOVA  | 15 per group |                 |                   |            |
| Supplementary 7D - Open Arm Duration ANOVA TABLE | Sum of Squares | DF           | Mean of Squares | F (DFn, DFd)      | P value    |
| Interaction                                      | 7482           | 1            | 7482            | F (1, 56) = 39.92 | P < 0.0001 |

|           |       |    |       |                   |            |
|-----------|-------|----|-------|-------------------|------------|
| Genotype  | 25792 | 1  | 25792 | F (1, 56) = 137.6 | P < 0.0001 |
| Treatment | 7437  | 1  | 7437  | F (1, 56) = 39.68 | P < 0.0001 |
| Residual  | 10496 | 56 | 187.4 |                   |            |

Supplementary Figure 7D - Open Arm Duration Multiple Comparisons

| Tukey's multiple comparisons test | Mean Diff. | 95% CI of diff.  | Significant? | Adjusted P Value |
|-----------------------------------|------------|------------------|--------------|------------------|
| WT Vehicle vs WT Fluoxetine       | -44.6      | -57.84 to -31.36 | Yes          | < 0.0001         |
| WT Vehicle vs 1A KO Vehicle       | 19.13      | 5.896 to 32.37   | Yes          | 0.0018           |
| WT Vehicle vs 1A KO Fluoxetine    | 19.2       | 5.963 to 32.44   | Yes          | 0.0017           |
| WT Fluoxetine vs 1A KO Vehicle    | 63.73      | 50.50 to 76.97   | Yes          | < 0.0001         |
| WT Fluoxetine vs 1A KO Fluoxetine | 63.8       | 50.56 to 77.04   | Yes          | < 0.0001         |
| 1A KO Vehicle vs 1A KO Fluoxetine | 0.06667    | -13.17 to 13.30  | No           | > 0.9999         |

Figure Number  
Supplementary 7E

Test Used  
Two-Way ANOVA

n  
15 per group

| Supplementary 7E ANOVA TABLE | Sum of Squares | DF | Mean of Squares | F (DFn, DFd)      | P value    |
|------------------------------|----------------|----|-----------------|-------------------|------------|
| Interaction                  | 14947          | 1  | 14947           | F (1, 56) = 7.246 | P = 0.0094 |
| Genotype                     | 12819          | 1  | 12819           | F (1, 56) = 6.214 | P = 0.0157 |
| Treatment                    | 44010          | 1  | 44010           | F (1, 56) = 21.34 | P < 0.0001 |
| Residual                     | 115517         | 56 | 2063            |                   |            |

Supplementary Figure 7E Multiple Comparisons

| Tukey's multiple comparisons test | Mean Diff. | 95% CI of diff.  | Significant? | Adjusted P Value |
|-----------------------------------|------------|------------------|--------------|------------------|
| WT Vehicle vs WT Fluoxetine       | 85.73      | 41.82 to 129.6   | Yes          | < 0.0001         |
| WT Vehicle vs 1A KO Vehicle       | 2.333      | -41.58 to 46.25  | No           | 0.999            |
| WT Vehicle vs 1A KO Fluoxetine    | 24.93      | -18.98 to 68.85  | No           | 0.4423           |
| WT Fluoxetine vs 1A KO Vehicle    | -83.4      | -127.3 to -39.49 | Yes          | < 0.0001         |
| WT Fluoxetine vs 1A KO Fluoxetine | -60.8      | -104.7 to -16.89 | Yes          | 0.003            |
| 1A KO Vehicle vs 1A KO Fluoxetine | 22.6       | -21.31 to 66.51  | No           | 0.5277           |

Figure Number  
Supplementary 7F

Test Used  
Two-Way ANOVA

n  
8 per group

| Supplementary 7F ANOVA TABLE | Sum of Squares | DF | Mean of Squares | F (DFn, DFd)      | P value    |
|------------------------------|----------------|----|-----------------|-------------------|------------|
| Interaction                  | 186661         | 1  | 186661          | F (1, 28) = 23.70 | P < 0.0001 |
| Genotype                     | 186355         | 1  | 186355          | F (1, 28) = 23.66 | P < 0.0001 |
| Treatment                    | 185745         | 1  | 185745          | F (1, 28) = 23.58 | P < 0.0001 |
| Residual                     | 220569         | 28 | 7877            |                   |            |

Supplementary Figure 7F Multiple Comparisons

| Tukey's multiple comparisons test | Mean Diff. | 95% CI of diff.  | Significant? | Adjusted P Value |
|-----------------------------------|------------|------------------|--------------|------------------|
| WT Vehicle vs WT Fluoxetine       | -305.1     | -426.3 to -184.0 | Yes          | < 0.0001         |
| WT Vehicle vs 1A KO Vehicle       | -0.125     | -121.3 to 121.0  | No           | > 0.9999         |
| WT Vehicle vs 1A KO Fluoxetine    | 0.25       | -120.9 to 121.4  | No           | > 0.9999         |
| WT Fluoxetine vs 1A KO Vehicle    | 305        | 183.8 to 426.2   | Yes          | < 0.0001         |
| WT Fluoxetine vs 1A KO Fluoxetine | 305.4      | 184.2 to 426.5   | Yes          | < 0.0001         |
| 1A KO Vehicle vs 1A KO Fluoxetine | 0.375      | -120.8 to 121.5  | No           | > 0.9999         |

Figure Number  
Supplementary 7G

Test Used  
Two-Way ANOVA

n  
8 per group

| Supplementary 7G ANOVA TABLE | Sum of Squares | DF | Mean of Squares | F (DFn, DFd)      | P value    |
|------------------------------|----------------|----|-----------------|-------------------|------------|
| Interaction                  | 6.62E+07       | 1  | 6.62E+07        | F (1, 28) = 79.56 | P < 0.0001 |
| Genotype                     | 6.45E+07       | 1  | 6.45E+07        | F (1, 28) = 77.04 | P < 0.0001 |
| Treatment                    | 7.45E+07       | 1  | 7.45E+07        | F (1, 28) = 88.95 | P < 0.0001 |
| Residual                     | 2.35E+07       | 28 | 2.35E+07        |                   |            |

  

| Supplementary Figure 7G Multiple Comparisons | Mean Diff. | 95% CI of diff. | Significant? | Adjusted P Value |
|----------------------------------------------|------------|-----------------|--------------|------------------|
| Tukey's multiple comparisons test            |            |                 |              |                  |
| WT Vehicle vs WT Fluoxetine                  | -5937      | -7186 to -4688  | Yes          | < 0.0001         |
| WT Vehicle vs 1A KO Vehicle                  | -46        | -1295 to 1203   | No           | 0.9996           |
| WT Vehicle vs 1A KO Fluoxetine               | -211.6     | -1461 to 1038   | No           | 0.9666           |
| WT Fluoxetine vs 1A KO Vehicle               | 5891       | 4642 to 7140    | Yes          | < 0.0001         |
| WT Fluoxetine vs 1A KO Fluoxetine            | 5725       | 4476 to 6975    | Yes          | < 0.0001         |
| 1A KO Vehicle vs 1A KO Fluoxetine            | -165.6     | -1415 to 1084   | No           | 0.9834           |

| Figure Number    | Test Used     | n           |
|------------------|---------------|-------------|
| Supplementary 7H | Two-Way ANOVA | 8 per group |

  

| Supplementary 7H ANOVA TABLE | Sum of Squares | DF | Mean of Squares | F (DFn, DFd)      | P value    |
|------------------------------|----------------|----|-----------------|-------------------|------------|
| Interaction                  | 1.53E+07       | 1  | 1.53E+07        | F (1, 28) = 78.04 | P < 0.0001 |
| Genotype                     | 8.62E+06       | 1  | 8.62E+06        | F (1, 28) = 44.06 | P < 0.0001 |
| Treatment                    | 1.44E+07       | 1  | 1.44E+07        | F (1, 28) = 73.53 | P < 0.0001 |
| Residual                     | 5.48E+06       | 28 | 5.48E+06        |                   |            |

  

| Supplementary Figure 7H Multiple Comparisons | Mean Diff. | 95% CI of diff. | Significant? | Adjusted P Value |
|----------------------------------------------|------------|-----------------|--------------|------------------|
| Tukey's multiple comparisons test            |            |                 |              |                  |
| WT Vehicle vs WT Fluoxetine                  | -2723      | -3326 to -2119  | Yes          | < 0.0001         |
| WT Vehicle vs 1A KO Vehicle                  | -343.5     | -947.4 to 260.4 | No           | 0.4208           |
| WT Vehicle vs 1A KO Fluoxetine               | -303       | -906.9 to 300.9 | No           | 0.5279           |
| WT Fluoxetine vs 1A KO Vehicle               | 2379       | 1775 to 2983    | Yes          | < 0.0001         |
| WT Fluoxetine vs 1A KO Fluoxetine            | 2420       | 1816 to 3023    | Yes          | < 0.0001         |
| 1A KO Vehicle vs 1A KO Fluoxetine            | 40.5       | -563.4 to 644.4 | No           | 0.9978           |

| Figure Number    | Test Used        | n           |
|------------------|------------------|-------------|
| Supplementary 8A | Student's t-test | 6 per group |

  

| F test to compare variances | F, DFn, Dfd | P value | Significant? |
|-----------------------------|-------------|---------|--------------|
| Control vs POMC-Cre/fl1A    | 2.000, 5, 5 | 0.465   | No           |

  

| Supplementary 8A Student's t-test | P value | Significant? | One or two tailed? | t, df          |
|-----------------------------------|---------|--------------|--------------------|----------------|
| Control vs POMC-Cre/fl1A          | 0.9222  | No           | Two-tailed         | t=0.1002 df=10 |

| Figure Number    | Test Used     | n           |
|------------------|---------------|-------------|
| Supplementary 8B | One-Way ANOVA | 6 per group |

  

| Supplementary 8B ANOVA TABLE | SS    | DF | MS    | F (DFn, DFd)       | P value    |
|------------------------------|-------|----|-------|--------------------|------------|
| Treatment                    | 1578  | 2  | 788.9 | F (2, 15) = 0.1989 | P = 0.8218 |
| Residual                     | 59509 | 15 | 3967  |                    |            |
| Total                        | 61087 | 17 |       |                    |            |

ANOVA NOT SIGNIFICANT -- NO MULTIPLE COMPARISONS

| Figure Number                                        | Test Used                  | n                  |                                  |                         |
|------------------------------------------------------|----------------------------|--------------------|----------------------------------|-------------------------|
| Supplementary 8C                                     | Student's t-test           | 6 per group        |                                  |                         |
| F test to compare variances<br>1A KO vs DG-1A+       | F, DFn, Dfd<br>4.233, 5, 5 | P value<br>0.1393  | Significant?<br>No               |                         |
| Supplementary 8C Student's t-test<br>1A KO vs DG-1A+ | P value<br>0.6347          | Significant?<br>No | One or two tailed?<br>Two-tailed | t, df<br>t=0.4901 df=10 |
